# Supplementary material for: Ocean warming and acidification synergistically increase coral mortality
Source: PubMed Central journal article supplement (PMC5244398; doi:10.1038/srep40842), 2017-01-19
Supplement: srep40842-s1.pdf [file srep40842-s1.pdf]

# SUPPLEMENTARY INFORMATION

## Ocean warming and acidification synergistically increase coral mortality

F. Prada, E. Caroselli, S. Mengoli, L. Brizi, P. Fantazzini, B. Capaccioni, L. Pasquini, K. E. Fabricius, Z. Dubinsky, G. Falini, S. Goffredo

## SUPPLEMENTARY FIGURES

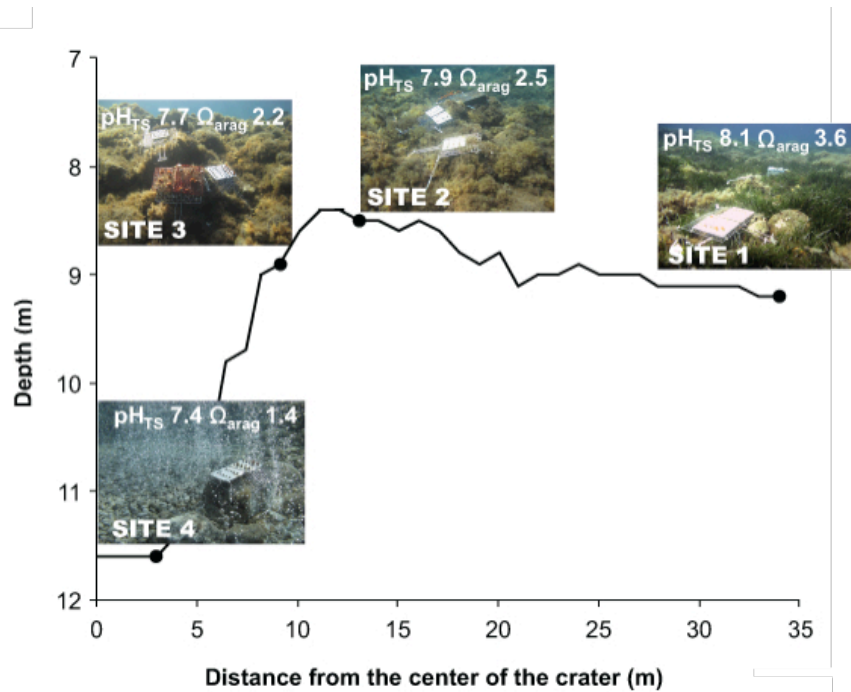

**Fig. S1. Bathymetric profile of the four sites.** Sites are shown in the pictures, with the associated mean  $\text{pH}_{\text{TS}}$  and  $\Omega_{\text{arag}}$ .

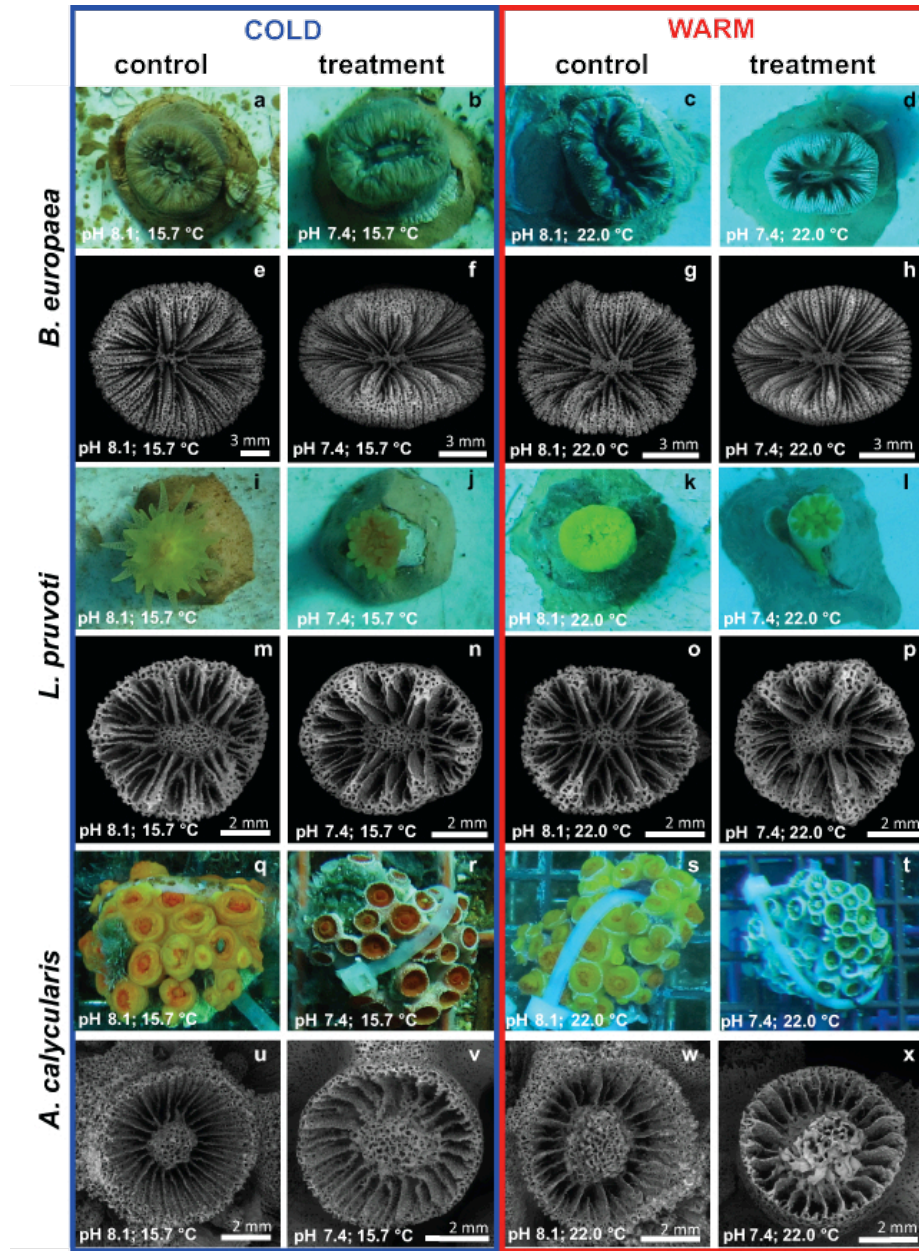

13

14 **Fig. S2. Images of the three coral species under different pH and temperature conditions. a-d, i-l, q-t:**  
 15 Pictures of live *B. europaea*, *L. pruvoti*, and *A. calycularis* specimens. **e-h, m-p, u-x:** Low magnification  
 16 SEM images of coral skeletons (image courtesy of J.C. Weaver at Harvard University). Images are reported  
 17 for corals exposed to mean pH 8.1 and pH 7.4 in COLD (November 2010-March 2011; mean temperature:  
 18 15.7°C) and WARM (May-June 2012; mean temperature: 22.0°C) periods.

19

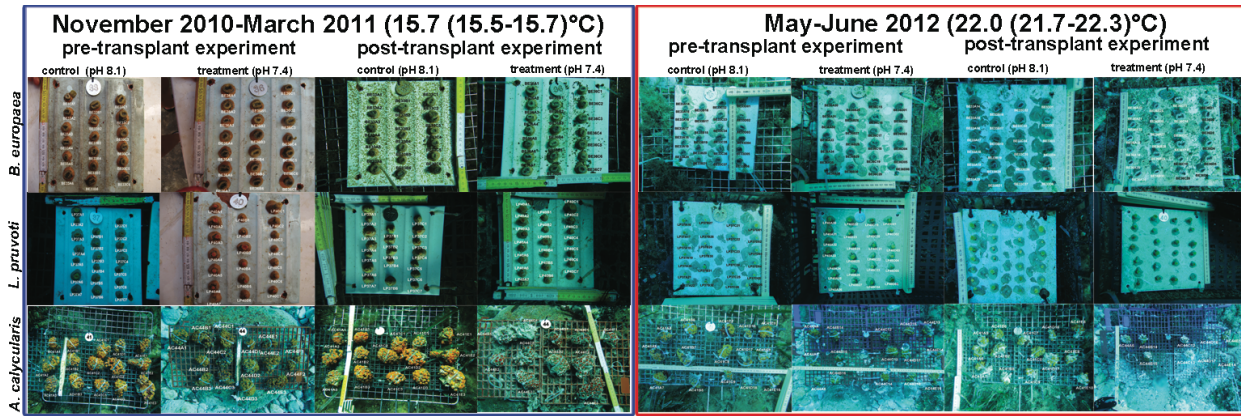

20  
21  
22  
23  
24  
25  
26

**Fig. S3. Pre and post experimental images for *B. europaea*, *L. pruvoti* and *A. calycularis* under different pH and temperature conditions.** A few examples are given of specimens at the beginning and at the end of transplant experiments in two representative transplant periods (COLD period in blue: November 2010-March 2011; WARM period in red: May-June 2012) and two sites (control: pH<sub>TS</sub> 8.1; treatment: pH<sub>TS</sub> 7.4).

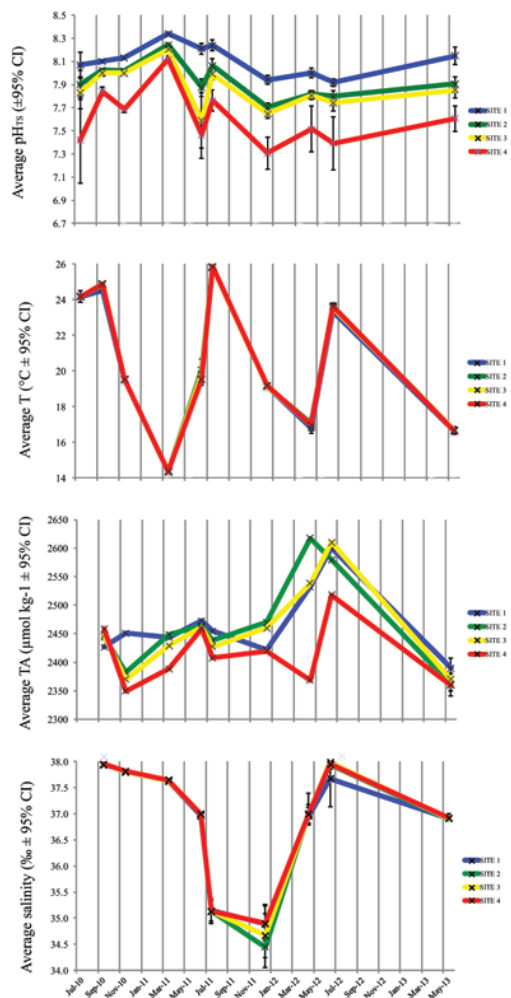

27

28

**Fig. S4. Plots of average pH<sub>TS</sub>, temperature, total alkalinity and salinity as measured at the times of data collection at the experimental sites. Average values and 95% confidence intervals were calculated from the related data reported in Table S1.**

29

30

31



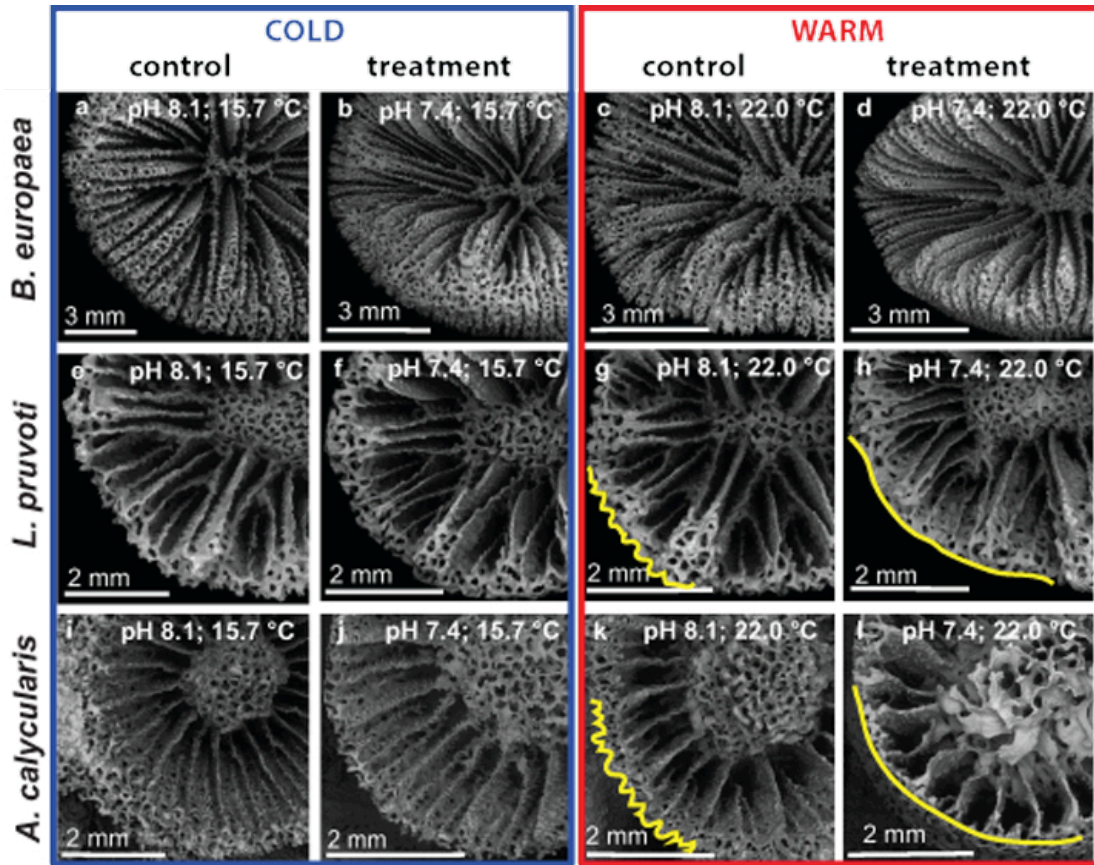

33

34

35

36

37

38

39

40

41

**Fig. S5. Low magnification SEM images of skeletons.** SEM images of skeletons of *Balanophyllia europaea*, *Leptopsammia pruvoti* and *Astroides calycularis* specimens under different pH and temperature conditions (image courtesy of J.C. Weaver at Harvard University). **a-d**, Images of *B. europaea*, **e-h**, *L. pruvoti*, and **i-l**, *A. calycularis* skeletons. **g, k**, Yellow contour lines highlight rough and **h, l**, smooth surfaces at mean pH 8.1 and pH 7.4, respectively, for *L. pruvoti* and *A. calycularis*. Images are reported for corals in COLD (November 2010-March 2011; mean temperature: 15.7°C) and WARM (May-June 2012; mean temperature: 22.0°C) periods.

| Measured Parameters                 |                                         |                                                   |                                                     |                                     |                          |
|-------------------------------------|-----------------------------------------|---------------------------------------------------|-----------------------------------------------------|-------------------------------------|--------------------------|
| Treatment                           | pH range<br>(total scale)               | T<br>(°C)                                         | TA<br>( $\mu\text{mol kg}^{-1}$ )                   | S<br>(‰)                            |                          |
| Site 1                              | 8.07 (7.82-8.45)                        | 20.5 (14.3-26.0)                                  | 2438 (2368-2600)                                    | 37 (33-38)                          |                          |
| Site 2                              | 7.87 (7.54-8.25)                        | 20.7 (14.4-26.0)                                  | 2429 (2334-2618)                                    | 37 (33-38)                          |                          |
| Site 3                              | 7.74 (7.05-8.21)                        | 20.6 (14.4-26.0)                                  | 2426 (2343-2610)                                    | 37 (34-38)                          |                          |
| Site 4                              | 7.40 (6.71-8.14)                        | 20.6 (14.4-26.0)                                  | 2395 (2329-2518)                                    | 37 (34-38)                          |                          |
| <b>Statistical<br/>significance</b> | ***                                     | NS                                                | NS                                                  | NS                                  |                          |
| Calculated Parameters               |                                         |                                                   |                                                     |                                     |                          |
| Treatment                           | * $p\text{CO}_2$<br>( $\mu\text{atm}$ ) | * $\text{HCO}_3^-$<br>( $\mu\text{mol kg}^{-1}$ ) | * $\text{CO}_3^{2-}$<br>( $\mu\text{mol kg}^{-1}$ ) | *DIC<br>( $\mu\text{mol kg}^{-1}$ ) | * $\Omega_{\text{arag}}$ |
| Site 1                              | 391 (127-780)                           | 1869 (1466-2144)                                  | 232 (120-398)                                       | 2114 (1867-2291)                    | 3.6 (1.8-6.3)            |
| Site 2                              | 672 (234-1561)                          | 2030 (1664-2264)                                  | 163 (68-314)                                        | 2214 (1984-2383)                    | 2.5 (1.1-5.0)            |
| Site 3                              | 907 (262-5100)                          | 2073 (1835-2365)                                  | 144 (25-243)                                        | 2246 (2089-2552)                    | 2.2 (0.4-3.9)            |
| Site 4                              | 1944 (306-7231)                         | 2159 (1826-2355)                                  | 96 (16-233)                                         | 2317 (2070-2613)                    | 1.4 (0.2-3.1)            |
| <b>Statistical<br/>significance</b> | ***                                     | ***                                               | ***                                                 | ***                                 | ***                      |

43

44 **Table S1. Seawater carbonate chemistry.** Measurements are shown for each study Site off the Island of  
 45 Panarea. Site 1 is the reference and sites 2-4 are the elevated  $p\text{CO}_2$  Sites. Temperature (T;  $n = 112-115$  per  
 46 site), pH ( $n = 103-110$  per site) and salinity (S;  $n = 107-110$  per site) were measured in July 2010, September  
 47 2010, November 2010, March 2011, June 2011, July-August 2011, November-December 2011, April-May  
 48 2012, June 2012 and May 2013. Total alkalinity (TA;  $n = 14$  per site) was measured in September 2010,  
 49 November 2010, March 2011, June 2011, July-August 2011, November-December 2011, April-May 2012,  
 50 June 2012 and May 2013.  $p\text{CO}_2$  = carbon dioxide partial pressure;  $\text{HCO}_3^-$  = bicarbonate;  $\text{CO}_3^{2-}$  = carbonate;  
 51 DIC = dissolved inorganic carbon;  $\Omega_{\text{arag}}$  = aragonite saturation; NS = not significant; \*\*\* $p < 0.001$ , Kruskal-  
 52 Wallis test. In brackets the min and max values.

53

54

55

56

57

58

59

60

61

62

63

|                                 | MORTALITY RATE         |                      |                  |                    |                   |                   |
|---------------------------------|------------------------|----------------------|------------------|--------------------|-------------------|-------------------|
|                                 | Dec 2011-<br>Apr 2012  | Nov 2010-Mar<br>2011 | Mar-<br>Jun 2011 | June-<br>July 2011 | July-<br>Dec 2011 | July-<br>Sep 2010 |
| <i>B. europaea</i><br>polyp     | 9                      | 12                   | 12               | 12                 | 12                | 9                 |
| <i>L. pruvoti</i> polyp         |                        | 12                   | 12               | 9                  | 12                | 9                 |
| <i>A. calycularis</i><br>polyp  |                        | 45                   | 46               | 44                 | 35                | 44                |
| <i>A. calycularis</i><br>tissue |                        | 45                   | 46               | 44                 | 35                | 39                |
|                                 | NET CALCIFICATION RATE |                      |                  |                    |                   |                   |
|                                 | Dec 2011-<br>Apr 2012  | Nov 2010-Mar<br>2011 | Mar-<br>Jun 2011 | July-<br>Dec 2011  |                   |                   |
| <i>B. europaea</i>              | 18                     | 24                   | 20               | 21                 |                   |                   |
| <i>L. pruvoti</i>               |                        | 21                   | 21               | 22                 |                   |                   |
| <i>A. calycularis</i>           |                        | 20                   | 15               | 12                 |                   |                   |

64  
65  
66  
67  
68  
69  
70  
71  
72  
73  
74  
75  
76  
77  
78  
79  
80  
81  
82  
83  
84  
85  
86  
87  
88  
89  
90  
91

**Table S2. Number of observations for each species and experimental period.**

For polyp mortality, number of tiles in *B. europaea* and *L. pruvoti*, and number of colonies in *A. calycularis*; for net calcification, number of polyps in *B. europaea* and *L. pruvoti*, and number of colonies in *A. calycularis*.

| December 2011-<br>April 2012 |                 | November 2010-<br>March 2011 |                 | March-June 2011 |                 | July-December 2011 |                 | June-July 2011 |                 | July-September 2010 |                 |
|------------------------------|-----------------|------------------------------|-----------------|-----------------|-----------------|--------------------|-----------------|----------------|-----------------|---------------------|-----------------|
| DATE                         | DEPTH<br>T (°C) | DATE                         | DEPTH<br>T (°C) | DATE            | DEPTH<br>T (°C) | DATE               | DEPTH<br>T (°C) | DATE           | DEPTH<br>T (°C) | DATE                | DEPTH<br>T (°C) |
| 20111201                     | 18.1            | 20101115                     | 18.8            | 20110303        | 14.3            | 20110731           | 24.6            | 20110606       | 21.5            | 20100714            | 26.4            |
| 20111201                     | 18.1            | 20101115                     | 18.7            | 20110303        | 14.3            | 20110731           | 24.5            | 20110606       | 21.3            | 20100714            | 24.8            |
| 20111201                     | 18.1            | 20101115                     | 18.6            | 20110303        | 14.1            | 20110731           | 24.4            | 20110606       | 21.3            | 20100714            | 24.5            |
| 20111201                     | 18.1            | 20101115                     | 18.8            | 20110303        | 14.2            | 20110731           | 24.5            | 20110606       | 21.4            | 20100714            | 24.5            |
| 20111201                     | 18.4            | 20101115                     | 19.1            | 20110303        | 14.4            | 20110731           | 25.1            | 20110606       | 21.7            | 20100714            | 25.7            |
| 20111201                     | 18.4            | 20101115                     | 19.1            | 20110303        | 14.6            | 20110731           | 25.2            | 20110606       | 22.1            | 20100714            | 27.3            |
| 20111201                     | 18.3            | 20101115                     | 19.0            | 20110303        | 14.5            | 20110731           | 24.8            | 20110606       | 21.9            | 20100714            | 27.7            |
| 20111201                     | 18.2            | 20101115                     | 18.9            | 20110303        | 14.4            | 20110731           | 24.6            | 20110606       | 21.7            | 20100714            | 27.5            |
| 20111202                     | 18.2            | 20101116                     | 18.8            | 20110304        | 14.3            | 20110801           | 24.4            | 20110607       | 21.4            | 20100715            | 26.6            |
| 20111202                     | 18.1            | 20101116                     | 18.7            | 20110304        | 14.3            | 20110801           | 24.3            | 20110607       | 21.2            | 20100715            | 25.6            |
| 20111202                     | 18.0            | 20101116                     | 18.8            | 20110304        | 14.0            | 20110801           | 24.3            | 20110607       | 21.0            | 20100715            | 25.3            |
| 20111202                     | 18.1            | 20101116                     | 18.8            | 20110304        | 14.0            | 20110801           | 24.5            | 20110607       | 21.5            | 20100715            | 25.3            |
| 20111202                     | 18.3            | 20101116                     | 18.8            | 20110304        | 14.2            | 20110801           | 25.0            | 20110607       | 22.0            | 20100715            | 25.2            |
| 20111202                     | 18.4            | 20101116                     | 18.8            | 20110304        | 14.4            | 20110801           | 25.2            | 20110607       | 22.4            | 20100715            | 26.9            |
| 20111202                     | 18.1            | 20101116                     | 18.7            | 20110304        | 14.3            | 20110801           | 24.7            | 20110607       | 22.2            | 20100715            | 27.8            |
| 20111202                     | 18.0            | 20101116                     | 18.7            | 20110304        | 14.2            | 20110801           | 24.5            | 20110607       | 21.3            | 20100715            | 27.7            |
| 20111203                     | 17.9            | 20101117                     | 18.6            | 20110305        | 14.1            | 20110802           | 24.4            | 20110608       | 21.0            | 20100716            | 26.8            |
| 20111203                     | 17.9            | 20101117                     | 18.7            | 20110305        | 14.1            | 20110802           | 24.3            | 20110608       | 20.8            | 20100716            | 25.5            |
| 20111203                     | 17.8            | 20101117                     | 18.7            | 20110305        | 14.1            | 20110802           | 24.3            | 20110608       | 21.3            | 20100716            | 26.7            |
| 20111203                     | 17.8            | 20101117                     | 18.7            | 20110305        | 14.1            | 20110802           | 24.6            | 20110608       | 21.4            | 20100716            | 25.3            |
| 20111203                     | 18.1            | 20101117                     | 18.6            | 20110305        | 14.4            | 20110802           | 25.2            | 20110608       | 21.9            | 20100716            | 26.0            |
| 20111203                     | 18.1            | 20101117                     | 18.6            | 20110305        | 14.5            | 20110802           | 25.5            | 20110608       | 21.3            | 20100716            | 27.0            |
| 20111203                     | 18.1            | 20101117                     | 18.5            | 20110305        | 14.3            | 20110802           | 24.9            | 20110608       | 20.8            | 20100716            | 27.1            |
| 20111203                     | 18.0            | 20101117                     | 18.5            | 20110305        | 14.1            | 20110802           | 24.7            | 20110608       | 21.4            | 20100716            | 27.7            |
| 20111204                     | 18.0            | 20101118                     | 18.5            | 20110306        | 14.1            | 20110803           | 24.6            | 20110609       | 21.3            | 20100717            | 27.7            |
| 20111204                     | 18.0            | 20101118                     | 18.5            | 20110306        | 14.2            | 20110803           | 24.5            | 20110609       | 20.8            | 20100717            | 27.5            |
| 20111204                     | 18.1            | 20101118                     | 18.5            | 20110306        | 14.1            | 20110803           | 24.4            | 20110609       | 19.9            | 20100717            | 26.5            |
| 20111204                     | 18.1            | 20101118                     | 18.4            | 20110306        | 14.2            | 20110803           | 24.7            | 20110609       | 19.7            | 20100717            | 26.2            |
| 20111204                     | 18.3            | 20101118                     | 18.5            | 20110306        | 14.2            | 20110803           | 25.4            | 20110609       | 20.7            | 20100717            | 26.8            |
| 20111204                     | 18.3            | 20101118                     | 18.4            | 20110306        | 14.4            | 20110803           | 25.6            | 20110609       | 20.0            | 20100717            | 27.0            |
| 20111204                     | 18.2            | 20101118                     | 18.4            | 20110306        | 14.2            | 20110803           | 25.0            | 20110609       | 19.2            | 20100717            | 27.7            |
| 20111204                     | 18.2            | 20101118                     | 18.3            | 20110306        | 14.0            | 20110803           | 24.7            | 20110609       | 19.7            | 20100717            | 28.3            |
| 20111205                     | 18.2            | 20101119                     | 18.3            | 20110307        | 14.0            | 20110804           | 24.6            | 20110610       | 19.8            | 20100718            | 28.2            |
| 20111205                     | 18.2            | 20101119                     | 18.4            | 20110307        | 14.0            | 20110804           | 24.6            | 20110610       | 19.8            | 20100718            | 28.0            |
| 20111205                     | 18.2            | 20101119                     | 18.3            | 20110307        | 14.0            | 20110804           | 24.5            | 20110610       | 20.2            | 20100718            | 27.5            |
| 20111205                     | 18.3            | 20101119                     | 18.4            | 20110307        | 13.9            | 20110804           | 24.7            | 20110610       | 20.5            | 20100718            | 26.8            |
| 20111205                     | 18.3            | 20101119                     | 18.5            | 20110307        | 14.3            | 20110804           | 25.2            | 20110610       | 20.9            | 20100718            | 27.3            |
| 20111205                     | 18.3            | 20101119                     | 18.4            | 20110307        | 14.3            | 20110804           | 25.4            | 20110610       | 21.0            | 20100718            | 28.0            |
| 20111205                     | 18.2            | 20101119                     | 18.4            | 20110307        | 14.1            | 20110804           | 25.0            | 20110610       | 20.5            | 20100718            | 28.4            |
| 20111205                     | 18.2            | 20101119                     | 18.3            | 20110307        | 13.7            | 20110804           | 24.8            | 20110610       | 20.2            | 20100718            | 28.5            |
| 20111206                     | 18.2            | 20101120                     | 18.3            | 20110308        | 13.6            | 20110805           | 24.6            | 20110611       | 20.1            | 20100719            | 27.0            |
| 20111206                     | 18.2            | 20101120                     | 18.3            | 20110308        | 13.4            | 20110805           | 24.7            | 20110611       | 20.3            | 20100719            | 27.1            |
| 20111206                     | 18.1            | 20101120                     | 18.2            | 20110308        | 13.5            | 20110805           | 24.7            | 20110611       | 20.4            | 20100719            | 25.9            |
| 20111206                     | 18.1            | 20101120                     | 18.2            | 20110308        | 13.7            | 20110805           | 25.0            | 20110611       | 20.5            | 20100719            | 25.9            |
| 20111206                     | 18.1            | 20101120                     | 18.5            | 20110308        | 14.0            | 20110805           | 25.5            | 20110611       | 21.3            | 20100719            | 25.6            |
| 20111206                     | 18.0            | 20101120                     | 18.5            | 20110308        | 14.1            | 20110805           | 25.8            | 20110611       | 21.4            | 20100719            | 27.1            |
| 20111206                     | 18.0            | 20101120                     | 18.4            | 20110308        | 13.8            | 20110805           | 25.2            | 20110611       | 20.8            | 20100719            | 27.4            |
| 20111206                     | 18.0            | 20101120                     | 18.3            | 20110308        | 13.7            | 20110805           | 24.8            | 20110611       | 19.6            | 20100719            | 27.3            |
| 20111207                     | 18.0            | 20101121                     | 18.2            | 20110309        | 13.5            | 20110806           | 24.6            | 20110612       | 19.5            | 20100720            | 25.5            |
| 20111207                     | 17.9            | 20101121                     | 18.1            | 20110309        | 13.4            | 20110806           | 24.6            | 20110612       | 20.2            | 20100720            | 25.3            |
| 20111207                     | 17.9            | 20101121                     | 18.1            | 20110309        | 13.6            | 20110806           | 24.6            | 20110612       | 20.7            | 20100720            | 25.2            |
| 20111207                     | 17.9            | 20101121                     | 18.1            | 20110309        | 13.7            | 20110806           | 25.1            | 20110612       | 20.7            | 20100720            | 25.1            |
| 20111207                     | 17.9            | 20101121                     | 18.4            | 20110309        | 14.3            | 20110806           | 25.7            | 20110612       | 21.3            | 20100720            | 26.1            |
| 20111207                     | 17.9            | 20101121                     | 18.4            | 20110309        | 14.5            | 20110806           | 25.7            | 20110612       | 21.3            | 20100720            | 27.0            |
| 20111207                     | 17.9            | 20101121                     | 18.2            | 20110309        | 14.2            | 20110806           | 25.2            | 20110612       | 20.5            | 20100720            | 27.8            |
| 20111207                     | 17.9            | 20101121                     | 18.1            | 20110309        | 14.0            | 20110806           | 25.0            | 20110612       | 20.4            | 20100720            | 27.8            |
| 20111208                     | 17.9            | 20101122                     | 18.1            | 20110310        | 13.8            | 20110807           | 25.1            | 20110613       | 19.9            | 20100721            | 26.0            |
| 20111208                     | 17.8            | 20101122                     | 18.2            | 20110310        | 13.7            | 20110807           | 25.0            | 20110613       | 20.3            | 20100721            | 26.0            |
| 20111208                     | 17.8            | 20101122                     | 18.1            | 20110310        | 13.7            | 20110807           | 25.0            | 20110613       | 20.5            | 20100721            | 25.8            |
| 20111208                     | 17.8            | 20101122                     | 18.3            | 20110310        | 13.7            | 20110807           | 25.4            | 20110613       | 21.0            | 20100721            | 25.3            |
| 20111208                     | 17.8            | 20101122                     | 18.4            | 20110310        | 14.2            | 20110807           | 26.1            | 20110613       | 21.4            | 20100721            | 26.1            |
| 20111208                     | 17.7            | 20101122                     | 18.3            | 20110310        | 14.4            | 20110807           | 26.2            | 20110613       | 21.4            | 20100721            | 27.2            |
| 20111208                     | 17.8            | 20101122                     | 18.3            | 20110310        | 14.1            | 20110807           | 25.7            | 20110613       | 21.0            | 20100721            | 28.0            |
| 20111208                     | 17.8            | 20101122                     | 18.3            | 20110310        | 13.9            | 20110807           | 25.8            | 20110613       | 20.7            | 20100721            | 28.4            |
| 20111209                     | 17.8            | 20101123                     | 18.3            | 20110311        | 13.7            | 20110808           | 25.7            | 20110614       | 20.6            | 20100722            | 27.6            |
| 20111209                     | 17.8            | 20101123                     | 18.3            | 20110311        | 13.7            | 20110808           | 25.5            | 20110614       | 20.7            | 20100722            | 25.9            |
| 20111209                     | 17.7            | 20101123                     | 18.3            | 20110311        | 13.7            | 20110808           | 25.4            | 20110614       | 20.8            | 20100722            | 25.4            |
| 20111209                     | 17.7            | 20101123                     | 18.2            | 20110311        | 13.7            | 20110808           | 25.7            | 20110614       | 21.1            | 20100722            | 25.2            |
| 20111209                     | 17.9            | 20101123                     | 18.2            | 20110311        | 14.6            | 20110808           | 26.4            | 20110614       | 21.5            | 20100722            | 26.6            |
| 20111209                     | 17.9            | 20101123                     | 18.1            | 20110311        | 14.8            | 20110808           | 26.5            | 20110614       | 21.6            | 20100722            | 27.5            |
| 20111209                     | 17.8            | 20101123                     | 18.2            | 20110311        | 14.5            | 20110808           | 26.3            | 20110614       | 21.2            | 20100722            | 28.0            |
| 20111209                     | 17.7            | 20101123                     | 18.1            | 20110311        | 14.2            | 20110808           | 26.1            | 20110614       | 21.1            | 20100722            | 28.1            |
| 20111210                     | 17.6            | 20101124                     | 18.1            | 20110312        | 14.1            | 20110809           | 25.9            | 20110615       | 20.9            | 20100723            | 28.0            |
| 20111210                     | 17.6            | 20101124                     | 18.1            | 20110312        | 13.9            | 20110809           | 25.8            | 20110615       | 20.8            | 20100723            | 25.8            |



|          |      |          |      |          |      |          |      |          |      |          |      |
|----------|------|----------|------|----------|------|----------|------|----------|------|----------|------|
| 20111210 | 17.5 | 20101124 | 18.0 | 20110312 | 13.8 | 20110809 | 25.7 | 20110615 | 20.9 | 20100723 | 25.2 |
| 20111210 | 17.6 | 20101124 | 18.0 | 20110312 | 14.0 | 20110809 | 25.9 | 20110615 | 21.0 | 20100723 | 25.6 |
| 20111210 | 17.8 | 20101124 | 18.0 | 20110312 | 14.4 | 20110809 | 26.7 | 20110615 | 21.9 | 20100723 | 25.9 |
| 20111210 | 17.8 | 20101124 | 17.9 | 20110312 | 14.5 | 20110809 | 26.6 | 20110615 | 22.3 | 20100723 | 27.3 |
| 20111210 | 17.6 | 20101124 | 17.9 | 20110312 | 14.2 | 20110809 | 26.0 | 20110615 | 21.6 | 20100723 | 27.7 |
| 20111210 | 17.4 | 20101124 | 17.8 | 20110312 | 13.9 | 20110809 | 25.5 | 20110615 | 21.3 | 20100723 | 28.0 |
| 20111211 | 17.3 | 20101125 | 17.7 | 20110313 | 13.8 | 20110810 | 24.9 | 20110616 | 21.3 | 20100724 | 28.0 |
| 20111211 | 17.4 | 20101125 | 17.7 | 20110313 | 13.7 | 20110810 | 24.9 | 20110616 | 21.2 | 20100724 | 27.3 |
| 20111211 | 17.4 | 20101125 | 17.7 | 20110313 | 13.7 | 20110810 | 25.2 | 20110616 | 21.2 | 20100724 | 27.3 |
| 20111211 | 17.5 | 20101125 | 17.7 | 20110313 | 13.7 | 20110810 | 25.4 | 20110616 | 21.3 | 20100724 | 26.7 |
| 20111211 | 17.6 | 20101125 | 17.7 | 20110313 | 13.8 | 20110810 | 25.7 | 20110616 | 22.2 | 20100724 | 27.0 |
| 20111211 | 17.6 | 20101125 | 17.8 | 20110313 | 13.9 | 20110810 | 25.6 | 20110616 | 22.5 | 20100724 | 27.4 |
| 20111211 | 17.5 | 20101125 | 17.7 | 20110313 | 13.9 | 20110810 | 25.3 | 20110616 | 21.9 | 20100724 | 27.2 |
| 20111211 | 17.3 | 20101125 | 17.7 | 20110313 | 13.9 | 20110810 | 25.1 | 20110616 | 21.5 | 20100724 | 27.3 |
| 20111212 | 17.3 | 20101126 | 17.6 | 20110314 | 13.9 | 20110811 | 24.7 | 20110617 | 21.4 | 20100725 | 26.8 |
| 20111212 | 17.4 | 20101126 | 17.6 | 20110314 | 13.8 | 20110811 | 24.7 | 20110617 | 21.3 | 20100725 | 25.8 |
| 20111212 | 17.4 | 20101126 | 17.7 | 20110314 | 13.8 | 20110811 | 24.8 | 20110617 | 21.4 | 20100725 | 25.3 |
| 20111212 | 17.6 | 20101126 | 17.6 | 20110314 | 14.0 | 20110811 | 25.1 | 20110617 | 22.0 | 20100725 | 24.6 |
| 20111212 | 17.9 | 20101126 | 17.7 | 20110314 | 14.5 | 20110811 | 25.6 | 20110617 | 22.8 | 20100725 | 24.5 |
| 20111212 | 17.9 | 20101126 | 17.7 | 20110314 | 14.6 | 20110811 | 25.7 | 20110617 | 23.0 | 20100725 | 26.0 |
| 20111212 | 17.8 | 20101126 | 17.7 | 20110314 | 14.4 | 20110811 | 25.2 | 20110617 | 22.4 | 20100725 | 26.2 |
| 20111212 | 17.8 | 20101127 | 17.6 | 20110314 | 14.3 | 20110811 | 24.9 | 20110617 | 22.2 | 20100725 | 25.9 |
| 20111213 | 17.7 | 20101127 | 17.6 | 20110315 | 14.1 | 20110812 | 24.7 | 20110618 | 22.1 | 20100726 | 25.4 |
| 20111213 | 17.7 | 20101127 | 17.6 | 20110315 | 13.9 | 20110812 | 24.6 | 20110618 | 22.0 | 20100726 | 25.1 |
| 20111213 | 17.6 | 20101127 | 17.6 | 20110315 | 13.8 | 20110812 | 24.7 | 20110618 | 22.1 | 20100726 | 23.8 |
| 20111213 | 17.5 | 20101127 | 17.5 | 20110315 | 14.0 | 20110812 | 25.0 | 20110618 | 22.4 | 20100726 | 23.9 |
| 20111213 | 17.5 | 20101128 | 17.4 | 20110315 | 14.7 | 20110812 | 25.6 | 20110618 | 23.3 | 20100726 | 24.0 |
| 20111213 | 17.5 | 20101128 | 17.3 | 20110315 | 14.8 | 20110812 | 25.7 | 20110618 | 23.7 | 20100726 | 24.5 |
| 20111213 | 17.4 | 20101128 | 17.3 | 20110315 | 14.6 | 20110812 | 25.3 | 20110618 | 23.7 | 20100726 | 24.6 |
| 20111213 | 17.5 | 20101128 | 17.5 | 20110315 | 14.5 | 20110812 | 25.1 | 20110618 | 23.6 | 20100726 | 24.9 |
| 20111214 | 17.6 | 20101128 | 17.5 | 20110316 | 14.4 | 20110813 | 24.8 | 20110619 | 23.4 | 20100727 | 24.8 |
| 20111214 | 17.5 | 20101128 | 17.6 | 20110316 | 14.3 | 20110813 | 24.7 | 20110619 | 23.1 | 20100727 | 24.7 |
| 20111214 | 17.4 | 20101128 | 17.6 | 20110316 | 14.2 | 20110813 | 24.7 | 20110619 | 22.8 | 20100727 | 23.5 |
| 20111214 | 17.4 | 20101128 | 17.8 | 20110316 | 14.3 | 20110813 | 25.0 | 20110619 | 23.2 | 20100727 | 23.6 |
| 20111214 | 17.8 | 20101129 | 17.8 | 20110316 | 14.8 | 20110813 | 25.7 | 20110619 | 23.8 | 20100727 | 24.5 |
| 20111214 | 17.9 | 20101129 | 17.6 | 20110316 | 14.8 | 20110813 | 25.8 | 20110619 | 23.5 | 20100727 | 24.8 |
| 20111214 | 17.9 | 20101129 | 17.6 | 20110316 | 14.4 | 20110813 | 25.4 | 20110619 | 22.5 | 20100727 | 25.1 |
| 20111214 | 18.0 | 20101129 | 17.5 | 20110316 | 14.2 | 20110813 | 25.1 | 20110619 | 21.4 | 20100727 | 24.8 |
| 20111215 | 18.0 | 20101129 | 17.6 | 20110317 | 14.3 | 20110814 | 25.0 | 20110620 | 21.0 | 20100728 | 24.1 |
| 20111215 | 18.0 | 20101129 | 17.5 | 20110317 | 14.3 | 20110814 | 24.8 | 20110620 | 21.0 | 20100728 | 23.1 |
| 20111215 | 18.0 | 20101129 | 17.5 | 20110317 | 14.2 | 20110814 | 24.8 | 20110620 | 21.3 | 20100728 | 23.5 |
| 20111215 | 18.0 | 20101129 | 17.5 | 20110317 | 14.3 | 20110814 | 24.9 | 20110620 | 22.3 | 20100728 | 23.9 |
| 20111215 | 18.0 | 20101130 | 17.3 | 20110317 | 14.8 | 20110814 | 25.5 | 20110620 | 22.7 | 20100728 | 24.6 |
| 20111215 | 18.0 | 20101130 | 17.2 | 20110317 | 14.8 | 20110814 | 25.7 | 20110620 | 22.6 | 20100728 | 25.2 |
| 20111215 | 17.9 | 20101130 | 17.2 | 20110317 | 14.5 | 20110814 | 25.3 | 20110620 | 22.4 | 20100728 | 25.7 |
| 20111215 | 17.8 | 20101130 | 17.3 | 20110317 | 14.6 | 20110814 | 25.0 | 20110620 | 22.2 | 20100728 | 25.6 |
| 20111216 | 17.7 | 20101130 | 17.5 | 20110318 | 14.5 | 20110815 | 24.8 | 20110621 | 22.0 | 20100729 | 25.6 |
| 20111216 | 17.4 | 20101130 | 17.5 | 20110318 | 14.4 | 20110815 | 24.6 | 20110621 | 22.0 | 20100729 | 25.5 |
| 20111216 | 17.5 | 20101130 | 17.4 | 20110318 | 14.4 | 20110815 | 24.5 | 20110621 | 22.1 | 20100729 | 25.3 |
| 20111216 | 17.4 | 20101130 | 17.4 | 20110318 | 14.3 | 20110815 | 24.8 | 20110621 | 22.4 | 20100729 | 25.2 |
| 20111216 | 17.4 | 20101201 | 17.4 | 20110318 | 14.4 | 20110815 | 25.7 | 20110621 | 23.1 | 20100729 | 25.3 |
| 20111216 | 17.4 | 20101201 | 17.3 | 20110318 | 14.4 | 20110815 | 25.7 | 20110621 | 23.1 | 20100729 | 25.7 |
| 20111216 | 17.5 | 20101201 | 17.2 | 20110318 | 14.3 | 20110815 | 25.3 | 20110621 | 22.3 | 20100729 | 26.1 |
| 20111216 | 17.6 | 20101201 | 17.3 | 20110318 | 14.3 | 20110815 | 25.2 | 20110621 | 21.9 | 20100729 | 26.0 |
| 20111217 | 17.6 | 20101201 | 17.4 | 20110319 | 14.3 | 20110816 | 25.0 | 20110622 | 22.9 | 20100730 | 25.9 |
| 20111217 | 17.5 | 20101201 | 17.3 | 20110319 | 14.4 | 20110816 | 24.9 | 20110622 | 23.0 | 20100730 | 25.3 |
| 20111217 | 17.3 | 20101201 | 17.5 | 20110319 | 14.2 | 20110816 | 24.8 | 20110622 | 22.9 | 20100730 | 24.9 |
| 20111217 | 17.2 | 20101201 | 17.5 | 20110319 | 14.3 | 20110816 | 25.2 | 20110622 | 23.1 | 20100730 | 24.9 |
| 20111217 | 17.2 | 20101202 | 17.4 | 20110319 | 14.7 | 20110816 | 25.8 | 20110622 | 23.0 | 20100730 | 25.0 |
| 20111217 | 17.1 | 20101202 | 17.4 | 20110319 | 14.9 | 20110816 | 25.9 | 20110622 | 23.5 | 20100730 | 24.8 |
| 20111217 | 17.3 | 20101202 | 17.3 | 20110319 | 14.6 | 20110816 | 25.5 | 20110622 | 23.4 | 20100730 | 25.2 |
| 20111217 | 17.4 | 20101202 | 17.4 | 20110319 | 14.4 | 20110816 | 25.4 | 20110622 | 23.5 | 20100730 | 25.2 |
| 20111218 | 17.3 | 20101202 | 17.5 | 20110320 | 14.3 | 20110817 | 25.3 | 20110623 | 23.5 | 20100731 | 25.2 |
| 20111218 | 17.5 | 20101202 | 17.4 | 20110320 | 14.3 | 20110817 | 25.1 | 20110623 | 23.4 | 20100731 | 25.2 |
| 20111218 | 17.7 | 20101202 | 17.4 | 20110320 | 14.2 | 20110817 | 25.0 | 20110623 | 23.2 | 20100731 | 25.1 |
| 20111218 | 17.7 | 20101202 | 17.4 | 20110320 | 14.3 | 20110817 | 25.3 | 20110623 | 23.4 | 20100731 | 25.2 |
| 20111218 | 17.7 | 20101203 | 17.3 | 20110320 | 14.5 | 20110817 | 25.8 | 20110623 | 23.5 | 20100731 | 25.3 |
| 20111218 | 17.8 | 20101203 | 17.3 | 20110320 | 14.8 | 20110817 | 26.1 | 20110623 | 24.0 | 20100731 | 25.5 |
| 20111218 | 17.7 | 20101203 | 17.3 | 20110320 | 14.6 | 20110817 | 25.7 | 20110623 | 23.7 | 20100731 | 25.6 |
| 20111218 | 17.7 | 20101203 | 17.3 | 20110320 | 14.5 | 20110817 | 25.5 | 20110623 | 23.4 | 20100731 | 25.5 |
| 20111219 | 17.6 | 20101203 | 17.3 | 20110321 | 14.4 | 20110818 | 25.4 | 20110624 | 23.2 | 20100801 | 25.4 |
| 20111219 | 17.6 | 20101203 | 17.2 | 20110321 | 14.3 | 20110818 | 25.1 | 20110624 | 22.9 | 20100801 | 25.3 |
| 20111219 | 17.3 | 20101203 | 17.2 | 20110321 | 14.3 | 20110818 | 25.2 | 20110624 | 22.7 | 20100801 | 25.3 |
| 20111219 | 17.0 | 20101203 | 17.1 | 20110321 | 14.2 | 20110818 | 25.6 | 20110624 | 23.1 | 20100801 | 25.2 |
| 20111219 | 17.0 | 20101204 | 17.2 | 20110321 | 14.8 | 20110818 | 26.2 | 20110624 | 24.0 | 20100801 | 25.4 |
| 20111219 | 17.0 | 20101204 | 17.1 | 20110321 | 15.0 | 20110818 | 26.3 | 20110624 | 24.3 | 20100801 | 26.0 |
| 20111219 | 16.9 | 20101204 | 17.0 | 20110321 | 14.7 | 20110818 | 25.8 | 20110624 | 23.5 | 20100801 | 26.0 |
| 20111219 | 17.0 | 20101204 | 17.0 | 20110321 | 14.5 | 20110818 | 25.6 | 20110624 | 23.2 | 20100801 | 26.0 |

|          |      |          |      |          |      |          |      |          |      |          |      |
|----------|------|----------|------|----------|------|----------|------|----------|------|----------|------|
| 20111220 | 17.0 | 20101204 | 17.0 | 20110322 | 14.3 | 20110819 | 25.4 | 20110625 | 22.8 | 20100802 | 25.9 |
| 20111220 | 17.3 | 20101204 | 17.0 | 20110322 | 14.2 | 20110819 | 25.2 | 20110625 | 23.4 | 20100802 | 25.6 |
| 20111220 | 17.2 | 20101204 | 17.0 | 20110322 | 14.3 | 20110819 | 25.4 | 20110625 | 23.3 | 20100802 | 25.5 |
| 20111220 | 17.3 | 20101204 | 17.0 | 20110322 | 14.4 | 20110819 | 25.7 | 20110625 | 23.5 | 20100802 | 25.5 |
| 20111220 | 17.4 | 20101205 | 17.0 | 20110322 | 14.8 | 20110819 | 26.4 | 20110625 | 23.8 | 20100802 | 25.6 |
| 20111220 | 17.3 | 20101205 | 16.9 | 20110322 | 15.2 | 20110819 | 26.5 | 20110625 | 23.6 | 20100802 | 26.0 |
| 20111220 | 17.2 | 20101205 | 16.9 | 20110322 | 14.7 | 20110819 | 25.9 | 20110625 | 23.3 | 20100802 | 26.4 |
| 20111220 | 17.3 | 20101205 | 16.9 | 20110322 | 14.6 | 20110819 | 25.7 | 20110625 | 23.0 | 20100802 | 26.3 |
| 20111221 | 17.2 | 20101205 | 17.0 | 20110323 | 14.5 | 20110820 | 25.5 | 20110626 | 23.1 | 20100803 | 25.9 |
| 20111221 | 17.0 | 20101205 | 17.0 | 20110323 | 14.4 | 20110820 | 25.5 | 20110626 | 22.9 | 20100803 | 25.0 |
| 20111221 | 16.9 | 20101205 | 16.9 | 20110323 | 14.4 | 20110820 | 25.6 | 20110626 | 22.6 | 20100803 | 25.4 |
| 20111221 | 17.1 | 20101205 | 16.8 | 20110323 | 14.6 | 20110820 | 25.8 | 20110626 | 22.7 | 20100803 | 25.0 |
| 20111221 | 17.0 | 20101206 | 16.8 | 20110323 | 15.1 | 20110820 | 26.5 | 20110626 | 23.5 | 20100803 | 25.4 |
| 20111221 | 17.0 | 20101206 | 16.8 | 20110323 | 15.5 | 20110820 | 26.5 | 20110626 | 23.9 | 20100803 | 25.7 |
| 20111221 | 16.9 | 20101206 | 16.6 | 20110323 | 14.9 | 20110820 | 26.0 | 20110626 | 23.6 | 20100803 | 22.2 |
| 20111221 | 16.8 | 20101206 | 16.7 | 20110323 | 14.5 | 20110820 | 25.8 | 20110626 | 23.5 | 20100803 | 22.1 |
| 20111222 | 16.6 | 20101206 | 17.0 | 20110324 | 14.4 | 20110821 | 25.9 | 20110627 | 23.2 | 20100804 | 25.9 |
| 20111222 | 16.4 | 20101206 | 17.0 | 20110324 | 14.3 | 20110821 | 25.9 | 20110627 | 22.8 | 20100804 | 25.8 |
| 20111222 | 16.2 | 20101206 | 16.9 | 20110324 | 14.2 | 20110821 | 25.9 | 20110627 | 22.4 | 20100804 | 24.9 |
| 20111222 | 16.2 | 20101206 | 16.8 | 20110324 | 14.4 | 20110821 | 26.2 | 20110627 | 23.1 | 20100804 | 25.7 |
| 20111222 | 16.4 | 20101207 | 16.7 | 20110324 | 15.2 | 20110821 | 26.8 | 20110627 | 23.9 | 20100804 | 26.0 |
| 20111222 | 16.5 | 20101207 | 16.7 | 20110324 | 15.2 | 20110821 | 26.8 | 20110627 | 24.1 | 20100804 | 26.3 |
| 20111222 | 16.4 | 20101207 | 16.8 | 20110324 | 14.9 | 20110821 | 26.3 | 20110627 | 23.6 | 20100804 | 26.3 |
| 20111222 | 16.4 | 20101207 | 16.8 | 20110324 | 14.7 | 20110821 | 26.1 | 20110627 | 23.5 | 20100804 | 26.4 |
| 20111223 | 16.4 | 20101207 | 17.1 | 20110325 | 14.5 | 20110822 | 26.1 | 20110628 | 23.2 | 20100805 | 26.2 |
| 20111223 | 16.3 | 20101207 | 17.1 | 20110325 | 14.4 | 20110822 | 26.0 | 20110628 | 23.1 | 20100805 | 25.9 |
| 20111223 | 16.3 | 20101207 | 17.0 | 20110325 | 14.4 | 20110822 | 25.9 | 20110628 | 23.1 | 20100805 | 24.6 |
| 20111223 | 16.4 | 20101207 | 17.0 | 20110325 | 14.6 | 20110822 | 26.1 | 20110628 | 23.4 | 20100805 | 25.4 |
| 20111223 | 16.7 | 20101208 | 16.8 | 20110325 | 15.6 | 20110822 | 26.8 | 20110628 | 23.9 | 20100805 | 25.8 |
| 20111223 | 16.7 | 20101208 | 16.7 | 20110325 | 15.9 | 20110822 | 26.7 | 20110628 | 24.1 | 20100805 | 26.1 |
| 20111223 | 16.6 | 20101208 | 16.6 | 20110325 | 15.2 | 20110822 | 26.3 | 20110628 | 23.6 | 20100805 | 26.6 |
| 20111223 | 16.5 | 20101208 | 16.8 | 20110325 | 14.7 | 20110822 | 26.2 | 20110628 | 23.2 | 20100805 | 26.4 |
| 20111224 | 16.6 | 20101208 | 17.0 | 20110326 | 14.4 | 20110823 | 25.9 | 20110629 | 23.1 | 20100806 | 26.3 |
| 20111224 | 16.7 | 20101208 | 17.1 | 20110326 | 14.3 | 20110823 | 25.7 | 20110629 | 23.0 | 20100806 | 26.1 |
| 20111224 | 16.5 | 20101208 | 17.0 | 20110326 | 14.3 | 20110823 | 25.7 | 20110629 | 23.0 | 20100806 | 25.7 |
| 20111224 | 16.5 | 20101208 | 17.0 | 20110326 | 14.6 | 20110823 | 26.1 | 20110629 | 23.4 | 20100806 | 25.6 |
| 20111224 | 16.8 | 20101209 | 16.9 | 20110326 | 15.2 | 20110823 | 26.8 | 20110629 | 23.3 | 20100806 | 25.7 |
| 20111224 | 17.0 | 20101209 | 16.9 | 20110326 | 15.6 | 20110823 | 27.3 | 20110629 | 23.5 | 20100806 | 25.7 |
| 20111224 | 17.0 | 20101209 | 16.9 | 20110326 | 15.1 | 20110823 | 27.0 | 20110629 | 23.5 | 20100806 | 25.7 |
| 20111224 | 16.9 | 20101209 | 16.9 | 20110326 | 14.9 | 20110823 | 26.8 | 20110629 | 23.4 | 20100806 | 25.7 |
| 20111225 | 17.0 | 20101209 | 17.0 | 20110327 | 14.8 | 20110824 | 26.7 | 20110630 | 23.3 | 20100807 | 25.5 |
| 20111225 | 17.0 | 20101209 | 16.9 | 20110327 | 14.8 | 20110824 | 26.6 | 20110630 | 23.1 | 20100807 | 25.4 |
| 20111225 | 17.0 | 20101209 | 16.9 | 20110327 | 14.8 | 20110824 | 26.5 | 20110630 | 23.2 | 20100807 | 24.9 |
| 20111225 | 17.0 | 20101209 | 16.8 | 20110327 | 14.9 | 20110824 | 26.7 | 20110630 | 23.6 | 20100807 | 24.0 |
| 20111225 | 17.0 | 20101210 | 16.8 | 20110327 | 15.7 | 20110824 | 27.2 | 20110630 | 24.2 | 20100807 | 24.6 |
| 20111225 | 17.0 | 20101210 | 16.8 | 20110327 | 16.1 | 20110824 | 27.4 | 20110630 | 24.5 | 20100807 | 25.3 |
| 20111225 | 17.0 | 20101210 | 16.8 | 20110327 | 15.9 | 20110824 | 26.6 | 20110630 | 24.0 | 20100807 | 25.4 |
| 20111225 | 16.9 | 20101210 | 16.7 | 20110327 | 15.7 | 20110824 | 26.2 | 20110630 | 23.6 | 20100807 | 25.3 |
| 20111226 | 16.9 | 20101210 | 16.6 | 20110328 | 15.5 | 20110825 | 26.3 | 20110701 | 23.4 | 20100808 | 25.2 |
| 20111226 | 16.9 | 20101210 | 16.5 | 20110328 | 15.3 | 20110825 | 26.2 | 20110701 | 23.1 | 20100808 | 25.0 |
| 20111226 | 16.9 | 20101210 | 16.6 | 20110328 | 15.2 | 20110825 | 26.3 | 20110701 | 23.0 | 20100808 | 24.3 |
| 20111226 | 16.9 | 20101210 | 16.6 | 20110328 | 15.3 | 20110825 | 26.5 | 20110701 | 23.5 | 20100808 | 24.8 |
| 20111226 | 17.0 | 20101211 | 16.4 | 20110328 | 15.5 | 20110825 | 27.3 | 20110701 | 24.1 | 20100808 | 24.9 |
| 20111226 | 17.0 | 20101211 | 16.4 | 20110328 | 15.8 | 20110825 | 27.5 | 20110701 | 24.1 | 20100808 | 25.3 |
| 20111226 | 16.9 | 20101211 | 16.3 | 20110328 | 15.6 | 20110825 | 26.8 | 20110701 | 23.5 | 20100808 | 25.8 |
| 20111226 | 16.7 | 20101211 | 16.3 | 20110328 | 15.3 | 20110825 | 26.8 | 20110701 | 23.2 | 20100808 | 25.7 |
| 20111227 | 16.6 | 20101211 | 16.3 | 20110329 | 14.9 | 20110826 | 26.2 | 20110702 | 23.0 | 20100809 | 25.6 |
| 20111227 | 16.5 | 20101211 | 16.2 | 20110329 | 14.8 | 20110826 | 26.1 | 20110702 | 23.3 | 20100809 | 25.5 |
| 20111227 | 16.4 | 20101211 | 16.1 | 20110329 | 14.7 | 20110826 | 26.3 | 20110702 | 23.6 | 20100809 | 25.4 |
| 20111227 | 16.4 | 20101211 | 16.2 | 20110329 | 14.8 | 20110826 | 26.7 | 20110702 | 23.9 | 20100809 | 25.0 |
| 20111227 | 16.5 | 20101212 | 16.2 | 20110329 | 15.2 | 20110826 | 27.3 | 20110702 | 24.5 | 20100809 | 25.6 |
| 20111227 | 16.3 | 20101212 | 16.3 | 20110329 | 15.2 | 20110826 | 27.3 | 20110702 | 24.3 | 20100809 | 25.7 |
| 20111227 | 16.3 | 20101212 | 16.3 | 20110329 | 14.8 | 20110826 | 27.0 | 20110702 | 24.1 | 20100809 | 26.3 |
| 20111227 | 16.0 | 20101212 | 16.4 | 20110329 | 14.7 | 20110826 | 26.9 | 20110702 | 24.0 | 20100809 | 26.3 |
| 20111228 | 16.1 | 20101212 | 16.4 | 20110330 | 14.7 | 20110827 | 26.9 | 20110703 | 23.5 | 20100810 | 26.3 |
| 20111228 | 16.1 | 20101212 | 16.4 | 20110330 | 14.7 | 20110827 | 26.8 | 20110703 | 23.5 | 20100810 | 25.8 |
| 20111228 | 16.0 | 20101212 | 16.4 | 20110330 | 14.6 | 20110827 | 26.8 | 20110703 | 23.4 | 20100810 | 25.6 |
| 20111228 | 16.2 | 20101212 | 16.5 | 20110330 | 14.8 | 20110827 | 26.9 | 20110703 | 23.5 | 20100810 | 24.8 |
| 20111228 | 16.3 | 20101213 | 16.5 | 20110330 | 15.4 | 20110827 | 27.6 | 20110703 | 24.6 | 20100810 | 25.7 |
| 20111228 | 16.3 | 20101213 | 16.5 | 20110330 | 15.7 | 20110827 | 27.8 | 20110703 | 24.4 | 20100810 | 26.2 |
| 20111228 | 16.2 | 20101213 | 16.4 | 20110330 | 15.2 | 20110827 | 27.2 | 20110703 | 24.0 | 20100810 | 26.5 |
| 20111228 | 16.2 | 20101213 | 16.4 | 20110330 | 14.8 | 20110827 | 27.0 | 20110703 | 23.7 | 20100810 | 26.6 |
| 20111229 | 16.2 | 20101213 | 16.4 | 20110331 | 14.7 | 20110828 | 26.8 | 20110704 | 23.5 | 20100811 | 26.3 |
| 20111229 | 16.1 | 20101213 | 16.3 | 20110331 | 14.7 | 20110828 | 26.0 | 20110704 | 23.4 | 20100811 | 25.9 |
| 20111229 | 16.1 | 20101213 | 16.4 | 20110331 | 14.7 | 20110828 | 25.0 | 20110704 | 23.5 | 20100811 | 25.9 |
| 20111229 | 16.2 | 20101213 | 16.4 | 20110331 | 14.8 | 20110828 | 24.9 | 20110704 | 24.1 | 20100811 | 25.9 |
| 20111229 | 16.6 | 20101214 | 16.2 | 20110331 | 15.3 | 20110828 | 25.5 | 20110704 | 24.7 | 20100811 | 26.1 |
| 20111229 | 16.6 | 20101214 | 16.3 | 20110331 | 15.6 | 20110828 | 25.4 | 20110704 | 24.7 | 20100811 | 26.4 |

|          |      |          |      |          |      |          |      |          |      |          |      |
|----------|------|----------|------|----------|------|----------|------|----------|------|----------|------|
| 20111229 | 16.4 | 20101214 | 16.3 | 20110331 | 15.2 | 20110828 | 25.9 | 20110704 | 24.4 | 20100811 | 26.6 |
| 20111229 | 16.3 | 20101214 | 16.3 | 20110331 | 14.8 | 20110828 | 25.7 | 20110704 | 24.1 | 20100811 | 26.6 |
| 20111230 | 16.3 | 20101214 | 16.4 | 20110401 | 14.8 | 20110829 | 25.7 | 20110705 | 23.9 | 20100812 | 26.6 |
| 20111230 | 16.3 | 20101214 | 16.3 | 20110401 | 14.7 | 20110829 | 25.7 | 20110705 | 23.9 | 20100812 | 26.3 |
| 20111230 | 16.3 | 20101214 | 16.2 | 20110401 | 14.6 | 20110829 | 26.0 | 20110705 | 23.9 | 20100812 | 25.9 |
| 20111230 | 16.3 | 20101214 | 16.1 | 20110401 | 14.8 | 20110829 | 26.4 | 20110705 | 24.1 | 20100812 | 25.4 |
| 20111230 | 16.6 | 20101215 | 15.9 | 20110401 | 15.2 | 20110829 | 26.3 | 20110705 | 24.3 | 20100812 | 25.9 |
| 20111230 | 16.6 | 20101215 | 16.0 | 20110401 | 15.3 | 20110829 | 25.8 | 20110705 | 24.2 | 20100812 | 26.4 |
| 20111230 | 16.6 | 20101215 | 16.0 | 20110401 | 15.1 | 20110829 | 25.7 | 20110705 | 23.9 | 20100812 | 26.8 |
| 20111230 | 16.5 | 20101215 | 15.6 | 20110401 | 14.8 | 20110830 | 25.4 | 20110705 | 23.6 | 20100812 | 26.8 |
| 20111231 | 16.5 | 20101215 | 15.6 | 20110402 | 14.7 | 20110830 | 25.3 | 20110706 | 23.8 | 20100813 | 26.7 |
| 20111231 | 16.4 | 20101215 | 15.8 | 20110402 | 14.8 | 20110830 | 25.3 | 20110706 | 23.8 | 20100813 | 26.0 |
| 20111231 | 16.4 | 20101215 | 15.9 | 20110402 | 14.8 | 20110830 | 25.6 | 20110706 | 23.8 | 20100813 | 25.7 |
| 20111231 | 16.3 | 20101215 | 15.8 | 20110402 | 15.1 | 20110830 | 26.0 | 20110706 | 23.9 | 20100813 | 25.7 |
| 20111231 | 16.4 | 20101216 | 15.7 | 20110402 | 15.7 | 20110830 | 25.9 | 20110706 | 24.2 | 20100813 | 25.9 |
| 20111231 | 16.4 | 20101216 | 15.8 | 20110402 | 15.9 | 20110830 | 25.7 | 20110706 | 24.6 | 20100813 | 26.3 |
| 20111231 | 16.4 | 20101216 | 15.9 | 20110402 | 15.9 | 20110830 | 25.3 | 20110706 | 24.3 | 20100813 | 26.7 |
| 20111231 | 16.3 | 20101216 | 15.9 | 20110402 | 15.6 | 20110831 | 25.0 | 20110706 | 24.2 | 20100813 | 27.0 |
| 20120101 | 16.3 | 20101216 | 16.1 | 20110403 | 15.4 | 20110831 | 24.9 | 20110707 | 24.1 | 20100814 | 26.4 |
| 20120101 | 16.3 | 20101216 | 16.1 | 20110403 | 15.4 | 20110831 | 25.1 | 20110707 | 23.8 | 20100814 | 26.3 |
| 20120101 | 16.3 | 20101216 | 16.0 | 20110403 | 15.3 | 20110831 | 25.3 | 20110707 | 23.5 | 20100814 | 25.8 |
| 20120101 | 16.3 | 20101216 | 15.9 | 20110403 | 15.3 | 20110831 | 25.8 | 20110707 | 23.9 | 20100814 | 25.8 |
| 20120101 | 16.5 | 20101217 | 15.9 | 20110403 | 15.8 | 20110831 | 25.9 | 20110707 | 25.1 | 20100814 | 26.0 |
| 20120101 | 16.5 | 20101217 | 15.7 | 20110403 | 15.7 | 20110831 | 25.5 | 20110707 | 25.0 | 20100814 | 27.0 |
| 20120101 | 16.4 | 20101217 | 15.5 | 20110403 | 15.4 | 20110831 | 25.4 | 20110707 | 24.6 | 20100814 | 26.9 |
| 20120101 | 16.4 | 20101217 | 15.8 | 20110403 | 15.3 | 20110901 | 25.3 | 20110707 | 24.1 | 20100814 | 26.8 |
| 20120102 | 16.3 | 20101217 | 15.9 | 20110404 | 15.3 | 20110901 | 25.1 | 20110708 | 24.0 | 20100815 | 26.9 |
| 20120102 | 16.2 | 20101217 | 15.9 | 20110404 | 15.3 | 20110901 | 25.2 | 20110708 | 23.9 | 20100815 | 26.2 |
| 20120102 | 16.1 | 20101217 | 15.9 | 20110404 | 15.3 | 20110901 | 25.4 | 20110708 | 24.1 | 20100815 | 26.1 |
| 20120102 | 16.2 | 20101217 | 15.9 | 20110404 | 15.6 | 20110901 | 25.9 | 20110708 | 24.7 | 20100815 | 26.1 |
| 20120102 | 16.6 | 20101218 | 15.9 | 20110404 | 16.2 | 20110901 | 26.2 | 20110708 | 25.5 | 20100815 | 26.2 |
| 20120102 | 16.6 | 20101218 | 15.9 | 20110404 | 16.2 | 20110901 | 25.9 | 20110708 | 25.8 | 20100815 | 26.2 |
| 20120102 | 16.5 | 20101218 | 15.9 | 20110404 | 15.7 | 20110901 | 25.6 | 20110708 | 24.9 | 20100815 | 26.3 |
| 20120102 | 16.5 | 20101218 | 15.9 | 20110404 | 15.5 | 20110902 | 25.5 | 20110708 | 24.6 | 20100815 | 26.3 |
| 20120103 | 16.4 | 20101218 | 15.9 | 20110405 | 15.4 | 20110902 | 25.2 | 20110709 | 24.4 | 20100816 | 26.2 |
| 20120103 | 16.3 | 20101218 | 15.9 | 20110405 | 15.3 | 20110902 | 25.4 | 20110709 | 24.6 | 20100816 | 25.8 |
| 20120103 | 16.3 | 20101218 | 15.9 | 20110405 | 15.2 | 20110902 | 25.7 | 20110709 | 24.6 | 20100816 | 25.6 |
| 20120103 | 16.3 | 20101218 | 15.9 | 20110405 | 15.5 | 20110902 | 26.1 | 20110709 | 24.9 | 20100816 | 25.6 |
| 20120103 | 16.5 | 20101219 | 15.9 | 20110405 | 16.2 | 20110902 | 26.1 | 20110709 | 25.7 | 20100816 | 25.8 |
| 20120103 | 16.6 | 20101219 | 15.9 | 20110405 | 17.0 | 20110902 | 26.0 | 20110709 | 25.7 | 20100816 | 26.1 |
| 20120103 | 16.5 | 20101219 | 15.9 | 20110405 | 16.5 | 20110902 | 25.9 | 20110709 | 25.5 | 20100816 | 26.0 |
| 20120103 | 16.5 | 20101219 | 15.9 | 20110405 | 16.1 | 20110903 | 25.7 | 20110709 | 25.2 | 20100816 | 25.9 |
| 20120104 | 16.6 | 20101219 | 15.9 | 20110406 | 15.9 | 20110903 | 25.7 | 20110710 | 25.0 | 20100817 | 25.9 |
| 20120104 | 16.5 | 20101219 | 15.9 | 20110406 | 15.5 | 20110903 | 25.7 | 20110710 | 24.9 | 20100817 | 25.3 |
| 20120104 | 16.5 | 20101219 | 15.9 | 20110406 | 15.1 | 20110903 | 25.9 | 20110710 | 24.8 | 20100817 | 25.0 |
| 20120104 | 16.5 | 20101219 | 15.8 | 20110406 | 15.1 | 20110903 | 26.1 | 20110710 | 25.3 | 20100817 | 22.3 |
| 20120104 | 16.7 | 20101220 | 15.7 | 20110406 | 15.7 | 20110903 | 26.2 | 20110710 | 26.2 | 20100817 | 23.5 |
| 20120104 | 16.7 | 20101220 | 15.8 | 20110406 | 16.1 | 20110903 | 26.0 | 20110710 | 26.0 | 20100817 | 24.3 |
| 20120104 | 16.6 | 20101220 | 15.8 | 20110406 | 15.8 | 20110903 | 25.7 | 20110710 | 26.0 | 20100817 | 24.6 |
| 20120104 | 16.5 | 20101220 | 15.9 | 20110406 | 15.6 | 20110904 | 25.7 | 20110710 | 25.7 | 20100817 | 24.6 |
| 20120105 | 16.5 | 20101220 | 16.2 | 20110407 | 15.5 | 20110904 | 25.7 | 20110711 | 25.3 | 20100818 | 24.6 |
| 20120105 | 16.4 | 20101220 | 16.2 | 20110407 | 15.4 | 20110904 | 25.6 | 20110711 | 25.0 | 20100818 | 24.2 |
| 20120105 | 16.4 | 20101220 | 16.1 | 20110407 | 15.3 | 20110904 | 25.9 | 20110711 | 24.9 | 20100818 | 24.0 |
| 20120105 | 16.4 | 20101220 | 16.1 | 20110407 | 15.6 | 20110904 | 26.2 | 20110711 | 25.2 | 20100818 | 23.8 |
| 20120105 | 16.5 | 20101221 | 16.1 | 20110407 | 16.2 | 20110904 | 25.8 | 20110711 | 26.1 | 20100818 | 23.9 |
| 20120105 | 16.5 | 20101221 | 16.2 | 20110407 | 16.3 | 20110904 | 25.7 | 20110711 | 26.6 | 20100818 | 24.2 |
| 20120105 | 16.5 | 20101221 | 16.1 | 20110407 | 16.0 | 20110904 | 25.7 | 20110711 | 26.2 | 20100818 | 24.4 |
| 20120105 | 16.4 | 20101221 | 16.1 | 20110407 | 15.7 | 20110905 | 25.7 | 20110711 | 25.7 | 20100818 | 24.6 |
| 20120106 | 16.4 | 20101221 | 16.3 | 20110408 | 15.5 | 20110905 | 25.7 | 20110712 | 25.6 | 20100819 | 24.3 |
| 20120106 | 16.4 | 20101221 | 16.2 | 20110408 | 15.4 | 20110905 | 25.6 | 20110712 | 25.5 | 20100819 | 24.1 |
| 20120106 | 16.4 | 20101221 | 16.1 | 20110408 | 15.4 | 20110905 | 25.8 | 20110712 | 25.5 | 20100819 | 23.0 |
| 20120106 | 16.3 | 20101221 | 16.1 | 20110408 | 15.8 | 20110905 | 26.3 | 20110712 | 25.8 | 20100819 | 23.9 |
| 20120106 | 16.1 | 20101222 | 15.9 | 20110408 | 16.2 | 20110905 | 26.4 | 20110712 | 26.4 | 20100819 | 24.1 |
| 20120106 | 16.2 | 20101222 | 16.0 | 20110408 | 16.2 | 20110905 | 25.9 | 20110712 | 26.6 | 20100819 | 24.5 |
| 20120106 | 16.1 | 20101222 | 15.9 | 20110408 | 15.5 | 20110905 | 25.7 | 20110712 | 25.9 | 20100819 | 24.7 |
| 20120106 | 16.0 | 20101222 | 15.9 | 20110408 | 15.3 | 20110906 | 25.5 | 20110712 | 25.5 | 20100819 | 25.2 |
| 20120107 | 16.0 | 20101222 | 16.0 | 20110409 | 15.1 | 20110906 | 25.6 | 20110713 | 25.7 | 20100820 | 24.8 |
| 20120107 | 16.0 | 20101222 | 16.1 | 20110409 | 15.3 | 20110906 | 25.6 | 20110713 | 25.8 | 20100820 | 24.6 |
| 20120107 | 16.0 | 20101222 | 16.0 | 20110409 | 15.4 | 20110906 | 25.7 | 20110713 | 25.7 | 20100820 | 24.5 |
| 20120107 | 16.0 | 20101222 | 16.0 | 20110409 | 15.9 | 20110906 | 26.2 | 20110713 | 26.0 | 20100820 | 24.5 |
| 20120107 | 16.0 | 20101223 | 15.9 | 20110409 | 16.5 | 20110906 | 26.2 | 20110713 | 26.7 | 20100820 | 24.7 |
| 20120107 | 15.9 | 20101223 | 15.9 | 20110409 | 16.4 | 20110906 | 25.7 | 20110713 | 27.1 | 20100820 | 25.2 |
| 20120107 | 15.9 | 20101223 | 15.9 | 20110409 | 16.1 | 20110906 | 25.3 | 20110713 | 26.6 | 20100820 | 25.4 |
| 20120107 | 15.9 | 20101223 | 15.9 | 20110409 | 16.0 | 20110907 | 25.1 | 20110713 | 26.5 | 20100820 | 25.3 |
| 20120108 | 15.9 | 20101223 | 15.9 | 20110410 | 16.0 | 20110907 | 25.1 | 20110714 | 26.4 | 20100821 | 25.6 |
| 20120108 | 15.9 | 20101223 | 15.9 | 20110410 | 15.9 | 20110907 | 25.1 | 20110714 | 26.3 | 20100821 | 25.5 |
| 20120108 | 15.9 | 20101223 | 15.9 | 20110410 | 15.9 | 20110907 | 25.4 | 20110714 | 26.2 | 20100821 | 25.4 |
| 20120108 | 15.9 | 20101223 | 15.9 | 20110410 | 16.2 | 20110907 | 25.7 | 20110714 | 25.2 | 20100821 | 25.3 |

|          |      |          |      |          |      |          |      |          |      |          |      |
|----------|------|----------|------|----------|------|----------|------|----------|------|----------|------|
| 20120108 | 16.0 | 20101224 | 15.9 | 20110410 | 17.3 | 20110907 | 25.8 | 20110714 | 26.2 | 20100821 | 25.7 |
| 20120108 | 16.0 | 20101224 | 15.9 | 20110410 | 17.2 | 20110907 | 25.5 | 20110714 | 26.8 | 20100821 | 26.5 |
| 20120108 | 16.0 | 20101224 | 15.9 | 20110410 | 16.6 | 20110907 | 25.4 | 20110714 | 24.9 | 20100821 | 26.9 |
| 20120108 | 15.9 | 20101224 | 15.9 | 20110410 | 17.0 | 20110908 | 25.3 | 20110714 | 24.6 | 20100821 | 27.1 |
| 20120109 | 15.9 | 20101224 | 16.0 | 20110411 | 16.5 | 20110908 | 25.3 | 20110715 | 24.3 | 20100822 | 27.1 |
| 20120109 | 16.0 | 20101224 | 15.9 | 20110411 | 16.4 | 20110908 | 25.2 | 20110715 | 24.4 | 20100822 | 26.9 |
| 20120109 | 15.9 | 20101224 | 15.9 | 20110411 | 16.6 | 20110908 | 25.4 | 20110715 | 24.8 | 20100822 | 25.7 |
| 20120109 | 15.9 | 20101224 | 16.0 | 20110411 | 16.6 | 20110908 | 25.8 | 20110715 | 24.2 | 20100822 | 26.0 |
| 20120109 | 15.9 | 20101225 | 15.9 | 20110411 | 17.1 | 20110908 | 25.8 | 20110715 | 23.7 | 20100822 | 26.0 |
| 20120109 | 15.9 | 20101225 | 15.9 | 20110411 | 17.5 | 20110908 | 25.6 | 20110715 | 25.1 | 20100822 | 26.6 |
| 20120109 | 15.9 | 20101225 | 15.9 | 20110411 | 17.2 | 20110908 | 25.4 | 20110715 | 24.7 | 20100822 | 27.1 |
| 20120109 | 15.8 | 20101225 | 15.9 | 20110411 | 16.5 | 20110909 | 25.3 | 20110715 | 24.5 | 20100822 | 27.0 |
| 20120110 | 15.7 | 20101225 | 15.9 | 20110412 | 16.3 | 20110909 | 25.3 | 20110716 | 24.4 | 20100823 | 26.9 |
| 20120110 | 15.7 | 20101225 | 15.9 | 20110412 | 16.1 | 20110909 | 25.3 | 20110716 | 24.5 | 20100823 | 26.8 |
| 20120110 | 15.5 | 20101225 | 15.9 | 20110412 | 16.0 | 20110909 | 25.4 | 20110716 | 24.4 | 20100823 | 24.8 |
| 20120110 | 15.3 | 20101225 | 15.9 | 20110412 | 16.1 | 20110909 | 25.6 | 20110716 | 24.8 | 20100823 | 25.4 |
| 20120110 | 15.5 | 20101226 | 15.9 | 20110412 | 16.6 | 20110909 | 25.7 | 20110716 | 25.4 | 20100823 | 26.0 |
| 20120110 | 15.5 | 20101226 | 15.9 | 20110412 | 16.4 | 20110909 | 25.5 | 20110716 | 25.9 | 20100823 | 26.1 |
| 20120110 | 15.5 | 20101226 | 15.9 | 20110412 | 16.0 | 20110909 | 25.4 | 20110716 | 25.7 | 20100823 | 26.4 |
| 20120110 | 15.5 | 20101226 | 15.9 | 20110412 | 15.8 | 20110910 | 25.3 | 20110716 | 25.4 | 20100823 | 26.5 |
| 20120111 | 15.5 | 20101226 | 15.9 | 20110413 | 15.9 | 20110910 | 25.2 | 20110717 | 25.3 | 20100824 | 26.4 |
| 20120111 | 15.6 | 20101226 | 15.9 | 20110413 | 16.0 | 20110910 | 25.2 | 20110717 | 25.6 | 20100824 | 26.3 |
| 20120111 | 15.6 | 20101226 | 15.9 | 20110413 | 16.0 | 20110910 | 25.5 | 20110717 | 25.4 | 20100824 | 26.2 |
| 20120111 | 15.6 | 20101226 | 15.8 | 20110413 | 16.3 | 20110910 | 26.0 | 20110717 | 25.8 | 20100824 | 25.9 |
| 20120111 | 15.7 | 20101227 | 15.7 | 20110413 | 16.8 | 20110910 | 26.1 | 20110717 | 26.4 | 20100824 | 26.2 |
| 20120111 | 15.6 | 20101227 | 15.7 | 20110413 | 16.3 | 20110910 | 25.8 | 20110717 | 26.6 | 20100824 | 26.9 |
| 20120111 | 15.6 | 20101227 | 15.8 | 20110413 | 15.0 | 20110910 | 25.7 | 20110717 | 25.7 | 20100824 | 27.2 |
| 20120111 | 15.5 | 20101227 | 15.8 | 20110413 | 15.0 | 20110911 | 25.5 | 20110717 | 25.7 | 20100824 | 27.1 |
| 20120112 | 15.5 | 20101227 | 15.9 | 20110414 | 14.8 | 20110911 | 25.3 | 20110718 | 25.6 | 20100825 | 27.0 |
| 20120112 | 15.5 | 20101227 | 15.9 | 20110414 | 15.1 | 20110911 | 25.3 | 20110718 | 25.5 | 20100825 | 26.5 |
| 20120112 | 15.5 | 20101227 | 15.9 | 20110414 | 15.6 | 20110911 | 25.6 | 20110718 | 25.6 | 20100825 | 26.2 |
| 20120112 | 15.4 | 20101227 | 15.9 | 20110414 | 15.8 | 20110911 | 26.2 | 20110718 | 25.9 | 20100825 | 26.0 |
| 20120112 | 15.7 | 20101228 | 15.8 | 20110414 | 16.3 | 20110911 | 26.4 | 20110718 | 26.6 | 20100825 | 26.3 |
| 20120112 | 15.7 | 20101228 | 15.8 | 20110414 | 16.7 | 20110911 | 25.9 | 20110718 | 26.7 | 20100825 | 26.9 |
| 20120112 | 15.6 | 20101228 | 15.8 | 20110414 | 16.3 | 20110911 | 25.7 | 20110718 | 25.8 | 20100825 | 27.3 |
| 20120112 | 15.5 | 20101228 | 15.7 | 20110414 | 16.1 | 20110912 | 25.6 | 20110718 | 25.8 | 20100825 | 27.3 |
| 20120113 | 15.4 | 20101228 | 15.8 | 20110415 | 16.0 | 20110912 | 25.4 | 20110719 | 25.7 | 20100826 | 26.4 |
| 20120113 | 15.4 | 20101228 | 15.7 | 20110415 | 15.9 | 20110912 | 25.4 | 20110719 | 25.5 | 20100826 | 26.3 |
| 20120113 | 15.5 | 20101228 | 15.6 | 20110415 | 15.9 | 20110912 | 25.5 | 20110719 | 25.5 | 20100826 | 24.8 |
| 20120113 | 15.5 | 20101228 | 15.7 | 20110415 | 16.0 | 20110912 | 25.9 | 20110719 | 26.0 | 20100826 | 25.0 |
| 20120113 | 15.7 | 20101229 | 15.6 | 20110415 | 16.2 | 20110912 | 26.2 | 20110719 | 26.6 | 20100826 | 25.8 |
| 20120113 | 15.8 | 20101229 | 15.5 | 20110415 | 16.1 | 20110912 | 25.8 | 20110719 | 26.8 | 20100826 | 26.3 |
| 20120113 | 15.7 | 20101229 | 15.5 | 20110415 | 16.0 | 20110912 | 25.6 | 20110719 | 26.3 | 20100826 | 26.8 |
| 20120113 | 15.6 | 20101229 | 15.6 | 20110415 | 15.9 | 20110913 | 25.5 | 20110719 | 26.1 | 20100826 | 26.8 |
| 20120114 | 15.6 | 20101229 | 15.7 | 20110416 | 15.9 | 20110913 | 25.4 | 20110720 | 26.0 | 20100827 | 26.7 |
| 20120114 | 15.6 | 20101229 | 15.7 | 20110416 | 15.8 | 20110913 | 25.3 | 20110720 | 25.9 | 20100827 | 26.0 |
| 20120114 | 15.7 | 20101229 | 15.6 | 20110416 | 15.5 | 20110913 | 25.6 | 20110720 | 25.8 | 20100827 | 25.5 |
| 20120114 | 15.7 | 20101229 | 15.6 | 20110416 | 15.7 | 20110913 | 25.9 | 20110720 | 25.4 | 20100827 | 25.2 |
| 20120114 | 15.8 | 20101230 | 15.5 | 20110416 | 16.0 | 20110913 | 25.8 | 20110720 | 24.2 | 20100827 | 25.7 |
| 20120114 | 15.8 | 20101230 | 15.4 | 20110416 | 16.1 | 20110913 | 25.7 | 20110720 | 24.7 | 20100827 | 26.9 |
| 20120114 | 15.8 | 20101230 | 15.4 | 20110416 | 15.9 | 20110913 | 25.5 | 20110720 | 24.9 | 20100827 | 27.0 |
| 20120114 | 15.7 | 20101230 | 15.5 | 20110416 | 15.8 | 20110914 | 25.4 | 20110720 | 24.8 | 20100827 | 26.7 |
| 20120115 | 15.6 | 20101230 | 15.8 | 20110417 | 15.6 | 20110914 | 25.3 | 20110721 | 24.7 | 20100828 | 26.7 |
| 20120115 | 15.5 | 20101230 | 15.9 | 20110417 | 15.5 | 20110914 | 25.2 | 20110721 | 24.6 | 20100828 | 25.9 |
| 20120115 | 15.3 | 20101230 | 15.7 | 20110417 | 15.4 | 20110914 | 25.4 | 20110721 | 24.4 | 20100828 | 25.8 |
| 20120115 | 15.2 | 20101230 | 15.5 | 20110417 | 15.7 | 20110914 | 25.9 | 20110721 | 24.5 | 20100828 | 24.9 |
| 20120115 | 15.4 | 20101231 | 15.4 | 20110417 | 16.2 | 20110914 | 26.0 | 20110721 | 24.8 | 20100828 | 25.8 |
| 20120115 | 15.4 | 20101231 | 15.3 | 20110417 | 15.8 | 20110914 | 25.6 | 20110721 | 24.8 | 20100828 | 25.7 |
| 20120115 | 15.4 | 20101231 | 15.3 | 20110417 | 15.6 | 20110914 | 25.4 | 20110721 | 24.7 | 20100828 | 26.0 |
| 20120115 | 15.3 | 20101231 | 15.3 | 20110417 | 15.5 | 20110915 | 25.3 | 20110721 | 24.7 | 20100828 | 26.6 |
| 20120116 | 15.2 | 20101231 | 15.5 | 20110418 | 15.4 | 20110915 | 25.1 | 20110722 | 24.6 | 20100829 | 26.6 |
| 20120116 | 15.2 | 20101231 | 15.6 | 20110418 | 15.5 | 20110915 | 25.0 | 20110722 | 24.6 | 20100829 | 26.5 |
| 20120116 | 15.2 | 20101231 | 15.4 | 20110418 | 15.4 | 20110915 | 25.0 | 20110722 | 24.5 | 20100829 | 26.4 |
| 20120116 | 15.1 | 20101231 | 15.3 | 20110418 | 15.6 | 20110915 | 25.6 | 20110722 | 24.9 | 20100829 | 26.2 |
| 20120116 | 15.2 | 20110101 | 15.3 | 20110418 | 16.1 | 20110915 | 25.6 | 20110722 | 25.6 | 20100829 | 26.4 |
| 20120116 | 15.1 | 20110101 | 15.3 | 20110418 | 16.0 | 20110915 | 25.2 | 20110722 | 25.5 | 20100829 | 26.8 |
| 20120116 | 15.0 | 20110101 | 15.2 | 20110418 | 15.8 | 20110915 | 25.3 | 20110722 | 25.3 | 20100829 | 26.9 |
| 20120116 | 14.9 | 20110101 | 15.2 | 20110418 | 15.7 | 20110916 | 25.3 | 20110722 | 25.0 | 20100829 | 26.7 |
| 20120117 | 14.8 | 20110101 | 15.5 | 20110419 | 15.6 | 20110916 | 25.1 | 20110723 | 24.7 | 20100830 | 26.4 |
| 20120117 | 15.0 | 20110101 | 15.5 | 20110419 | 15.5 | 20110916 | 25.2 | 20110723 | 24.7 | 20100830 | 26.3 |
| 20120117 | 15.0 | 20110101 | 15.4 | 20110419 | 15.5 | 20110916 | 25.4 | 20110723 | 24.7 | 20100830 | 26.2 |
| 20120117 | 15.1 | 20110101 | 15.2 | 20110419 | 15.6 | 20110916 | 26.0 | 20110723 | 24.9 | 20100830 | 25.8 |
| 20120117 | 15.4 | 20110102 | 15.2 | 20110419 | 16.2 | 20110916 | 26.1 | 20110723 | 25.4 | 20100830 | 25.7 |
| 20120117 | 15.4 | 20110102 | 15.1 | 20110419 | 16.9 | 20110916 | 25.5 | 20110723 | 25.7 | 20100830 | 26.3 |
| 20120117 | 15.1 | 20110102 | 15.1 | 20110419 | 16.6 | 20110916 | 25.4 | 20110723 | 25.2 | 20100830 | 26.5 |
| 20120117 | 14.9 | 20110102 | 15.2 | 20110419 | 16.3 | 20110917 | 25.3 | 20110723 | 24.7 | 20100830 | 26.4 |
| 20120118 | 15.0 | 20110102 | 15.3 | 20110420 | 16.0 | 20110917 | 25.2 | 20110724 | 24.6 | 20100831 | 26.3 |
| 20120118 | 15.0 | 20110102 | 15.4 | 20110420 | 15.9 | 20110917 | 25.2 | 20110724 | 24.6 | 20100831 | 26.1 |



|          |      |          |      |          |      |          |      |          |      |
|----------|------|----------|------|----------|------|----------|------|----------|------|
| 20120128 | 14.8 | 20110112 | 15.3 | 20110430 | 15.9 | 20110927 | 23.6 | 20100910 | 24.6 |
| 20120128 | 14.8 | 20110112 | 15.3 | 20110430 | 15.8 | 20110927 | 23.7 | 20100910 | 24.6 |
| 20120128 | 14.8 | 20110112 | 15.2 | 20110430 | 15.8 | 20110927 | 24.0 | 20100910 | 24.5 |
| 20120128 | 14.8 | 20110112 | 15.2 | 20110430 | 15.8 | 20110927 | 24.1 | 20100910 | 24.5 |
| 20120128 | 15.0 | 20110113 | 15.1 | 20110430 | 15.9 | 20110927 | 23.9 | 20100910 | 24.5 |
| 20120128 | 15.1 | 20110113 | 15.1 | 20110430 | 16.1 | 20110927 | 23.7 | 20100910 | 24.6 |
| 20120128 | 14.9 | 20110113 | 15.0 | 20110430 | 16.1 | 20110928 | 23.5 | 20100910 | 24.5 |
| 20120128 | 14.8 | 20110113 | 15.1 | 20110430 | 16.1 | 20110928 | 23.4 | 20100910 | 24.5 |
| 20120129 | 14.8 | 20110113 | 15.3 | 20110501 | 16.1 | 20110928 | 23.5 | 20100911 | 24.5 |
| 20120129 | 14.8 | 20110113 | 15.3 | 20110501 | 16.2 | 20110928 | 23.6 | 20100911 | 24.4 |
| 20120129 | 14.6 | 20110113 | 15.1 | 20110501 | 16.2 | 20110928 | 24.1 | 20100911 | 24.4 |
| 20120129 | 14.6 | 20110113 | 15.1 | 20110501 | 16.3 | 20110928 | 24.1 | 20100911 | 24.3 |
| 20120129 | 14.9 | 20110114 | 15.1 | 20110501 | 16.3 | 20110928 | 23.8 | 20100911 | 24.4 |
| 20120129 | 14.9 | 20110114 | 15.0 | 20110501 | 16.4 | 20110928 | 23.6 | 20100911 | 24.5 |
| 20120129 | 14.8 | 20110114 | 14.9 | 20110501 | 16.1 | 20110929 | 23.5 | 20100911 | 24.6 |
| 20120129 | 14.8 | 20110114 | 15.0 | 20110501 | 16.0 | 20110929 | 23.3 | 20100911 | 24.5 |
| 20120130 | 14.7 | 20110114 | 15.3 | 20110502 | 15.9 | 20110929 | 23.3 | 20100912 | 24.5 |
| 20120130 | 14.7 | 20110114 | 15.3 | 20110502 | 16.2 | 20110929 | 23.5 | 20100912 | 24.3 |
| 20120130 | 14.8 | 20110114 | 15.2 | 20110502 | 16.3 | 20110929 | 23.9 | 20100912 | 24.2 |
| 20120130 | 14.8 | 20110114 | 15.1 | 20110502 | 16.5 | 20110929 | 24.2 | 20100912 | 24.2 |
| 20120130 | 14.8 | 20110115 | 15.1 | 20110502 | 16.7 | 20110929 | 23.6 | 20100912 | 24.3 |
| 20120130 | 14.8 | 20110115 | 15.0 | 20110502 | 16.5 | 20110929 | 23.5 | 20100912 | 24.5 |
| 20120130 | 14.6 | 20110115 | 14.9 | 20110502 | 16.3 | 20110930 | 23.5 | 20100912 | 24.5 |
| 20120130 | 14.6 | 20110115 | 15.0 | 20110502 | 16.0 | 20110930 | 23.2 | 20100912 | 24.6 |
| 20120131 | 14.6 | 20110115 | 15.3 | 20110503 | 16.1 | 20110930 | 23.0 | 20100913 | 24.5 |
| 20120131 | 14.5 | 20110115 | 15.3 | 20110503 | 16.2 | 20110930 | 23.5 | 20100913 | 24.5 |
| 20120131 | 14.4 | 20110115 | 15.2 | 20110503 | 16.2 | 20110930 | 24.0 | 20100913 | 24.3 |
| 20120131 | 14.6 | 20110115 | 15.1 | 20110503 | 16.5 | 20110930 | 24.0 | 20100913 | 24.4 |
| 20120131 | 14.8 | 20110116 | 15.1 | 20110503 | 16.3 | 20110930 | 23.4 | 20100913 | 24.4 |
| 20120131 | 14.8 | 20110116 | 15.0 | 20110503 | 16.3 | 20110930 | 23.3 | 20100913 | 24.6 |
| 20120131 | 14.8 | 20110116 | 14.9 | 20110503 | 16.2 | 20111001 | 23.2 | 20100913 | 24.6 |
| 20120131 | 14.8 | 20110116 | 14.9 | 20110503 | 16.1 | 20111001 | 23.2 | 20100913 | 24.7 |
| 20120201 | 14.8 | 20110116 | 15.3 | 20110504 | 16.1 | 20111001 | 23.1 | 20100914 | 24.6 |
| 20120201 | 14.6 | 20110116 | 15.4 | 20110504 | 16.2 | 20111001 | 23.3 | 20100914 | 24.5 |
| 20120201 | 14.6 | 20110116 | 15.2 | 20110504 | 16.2 | 20111001 | 23.7 | 20100914 | 24.5 |
| 20120201 | 14.8 | 20110116 | 15.1 | 20110504 | 16.2 | 20111001 | 23.9 | 20100914 | 24.4 |
| 20120201 | 14.8 | 20110117 | 15.1 | 20110504 | 16.2 | 20111001 | 23.5 | 20100914 | 24.5 |
| 20120201 | 14.8 | 20110117 | 15.1 | 20110504 | 16.4 | 20111001 | 23.3 | 20100914 | 24.6 |
| 20120201 | 14.8 | 20110117 | 15.1 | 20110504 | 16.1 | 20111002 | 23.1 | 20100914 | 25.0 |
| 20120201 | 14.8 | 20110117 | 15.1 | 20110504 | 16.0 | 20111002 | 23.0 | 20100914 | 24.8 |
| 20120202 | 14.8 | 20110117 | 15.4 | 20110505 | 16.0 | 20111002 | 22.9 | 20100915 | 24.8 |
| 20120202 | 14.8 | 20110117 | 15.4 | 20110505 | 16.0 | 20111002 | 23.0 | 20100915 | 24.7 |
| 20120202 | 14.8 | 20110117 | 15.3 | 20110505 | 16.1 | 20111002 | 23.5 | 20100915 | 24.6 |
| 20120202 | 14.8 | 20110117 | 15.2 | 20110505 | 16.3 | 20111002 | 23.7 | 20100915 | 24.6 |
| 20120202 | 14.9 | 20110118 | 15.2 | 20110505 | 16.8 | 20111002 | 23.4 | 20100915 | 24.5 |
| 20120202 | 14.8 | 20110118 | 15.2 | 20110505 | 17.0 | 20111002 | 23.1 | 20100915 | 24.8 |
| 20120202 | 14.8 | 20110118 | 15.0 | 20110505 | 16.7 | 20111003 | 23.0 | 20100915 | 24.9 |
| 20120202 | 14.7 | 20110118 | 15.0 | 20110505 | 16.4 | 20111003 | 22.9 | 20100915 | 24.9 |
| 20120203 | 14.7 | 20110118 | 15.4 | 20110506 | 16.3 | 20111003 | 22.9 | 20100916 | 24.6 |
| 20120203 | 14.6 | 20110118 | 15.5 | 20110506 | 16.3 | 20111003 | 23.2 | 20100916 | 24.5 |
| 20120203 | 14.6 | 20110118 | 15.3 | 20110506 | 16.3 | 20111003 | 24.2 | 20100916 | 24.5 |
| 20120203 | 14.5 | 20110118 | 15.2 | 20110506 | 16.8 | 20111003 | 24.4 | 20100916 | 24.5 |
| 20120203 | 14.6 | 20110119 | 15.1 | 20110506 | 17.5 | 20111003 | 23.6 | 20100916 | 24.5 |
| 20120203 | 14.6 | 20110119 | 15.1 | 20110506 | 17.3 | 20111003 | 23.3 | 20100916 | 24.5 |
| 20120203 | 14.6 | 20110119 | 15.0 | 20110506 | 17.8 | 20111004 | 23.1 | 20100916 | 24.5 |
| 20120203 | 14.5 | 20110119 | 15.0 | 20110506 | 17.0 | 20111004 | 23.0 | 20100916 | 24.7 |
| 20120204 | 14.6 | 20110119 | 15.4 | 20110507 | 16.6 | 20111004 | 23.0 |          |      |
| 20120204 | 14.6 | 20110119 | 15.4 | 20110507 | 16.6 | 20111004 | 23.3 |          |      |
| 20120204 | 14.6 | 20110119 | 15.3 | 20110507 | 16.8 | 20111004 | 23.8 |          |      |
| 20120204 | 14.6 | 20110119 | 15.1 | 20110507 | 17.0 | 20111004 | 23.9 |          |      |
| 20120204 | 14.7 | 20110120 | 15.0 | 20110507 | 18.1 | 20111004 | 23.5 |          |      |
| 20120204 | 14.8 | 20110120 | 15.1 | 20110507 | 18.1 | 20111004 | 23.4 |          |      |
| 20120204 | 14.7 | 20110120 | 15.0 | 20110507 | 17.1 | 20111005 | 23.2 |          |      |
| 20120204 | 14.7 | 20110120 | 14.9 | 20110507 | 16.9 | 20111005 | 23.0 |          |      |
| 20120205 | 14.7 | 20110120 | 15.2 | 20110508 | 16.7 | 20111005 | 23.1 |          |      |
| 20120205 | 14.6 | 20110120 | 15.2 | 20110508 | 16.6 | 20111005 | 23.4 |          |      |
| 20120205 | 14.4 | 20110120 | 15.1 | 20110508 | 16.6 | 20111005 | 23.8 |          |      |
| 20120205 | 14.5 | 20110120 | 14.9 | 20110508 | 17.0 | 20111005 | 23.8 |          |      |
| 20120205 | 14.7 | 20110121 | 14.9 | 20110508 | 18.1 | 20111005 | 23.5 |          |      |
| 20120205 | 14.7 | 20110121 | 14.9 | 20110508 | 18.2 | 20111005 | 23.4 |          |      |
| 20120205 | 14.5 | 20110121 | 14.9 | 20110508 | 18.1 | 20111006 | 23.2 |          |      |
| 20120205 | 14.4 | 20110121 | 14.9 | 20110508 | 17.1 | 20111006 | 23.1 |          |      |
| 20120206 | 14.4 | 20110121 | 15.1 | 20110509 | 16.8 | 20111006 | 23.0 |          |      |
| 20120206 | 14.5 | 20110121 | 15.1 | 20110509 | 17.0 | 20111006 | 23.3 |          |      |
| 20120206 | 14.5 | 20110121 | 15.1 | 20110509 | 17.1 | 20111006 | 23.8 |          |      |
| 20120206 | 14.4 | 20110121 | 15.0 | 20110509 | 17.3 | 20111006 | 23.7 |          |      |
| 20120206 | 14.5 | 20110122 | 14.9 | 20110509 | 17.5 | 20111006 | 23.4 |          |      |
| 20120206 | 14.5 | 20110122 | 14.9 | 20110509 | 17.2 | 20111006 | 23.1 |          |      |



|          |      |          |      |          |      |          |      |
|----------|------|----------|------|----------|------|----------|------|
| 20120206 | 14.3 | 20110122 | 14.9 | 20110509 | 17.0 | 20111007 | 22.9 |
| 20120206 | 14.2 | 20110122 | 14.8 | 20110509 | 16.8 | 20111007 | 22.9 |
| 20120207 | 14.1 | 20110122 | 14.9 | 20110510 | 16.6 | 20111007 | 22.9 |
| 20120207 | 14.1 | 20110122 | 14.8 | 20110510 | 16.5 | 20111007 | 23.2 |
| 20120207 | 14.0 | 20110122 | 14.8 | 20110510 | 16.5 | 20111007 | 23.5 |
| 20120207 | 14.1 | 20110122 | 14.8 | 20110510 | 16.6 | 20111007 | 23.4 |
| 20120207 | 14.3 | 20110123 | 14.8 | 20110510 | 17.3 | 20111007 | 23.3 |
| 20120207 | 14.4 | 20110123 | 14.8 | 20110510 | 17.4 | 20111007 | 23.0 |
| 20120207 | 14.5 | 20110123 | 14.8 | 20110510 | 17.0 | 20111008 | 22.8 |
| 20120207 | 14.4 | 20110123 | 14.8 | 20110510 | 16.8 | 20111008 | 23.0 |
| 20120208 | 14.4 | 20110123 | 14.8 | 20110511 | 16.5 | 20111008 | 23.0 |
| 20120208 | 14.5 | 20110123 | 15.0 | 20110511 | 16.2 | 20111008 | 23.0 |
| 20120208 | 14.4 | 20110123 | 15.0 | 20110511 | 16.3 | 20111008 | 22.9 |
| 20120208 | 14.4 | 20110123 | 14.8 | 20110511 | 16.8 | 20111008 | 22.9 |
| 20120208 | 14.6 | 20110124 | 14.8 | 20110511 | 17.1 | 20111008 | 22.6 |
| 20120208 | 14.6 | 20110124 | 14.7 | 20110511 | 17.1 | 20111008 | 22.4 |
| 20120208 | 14.5 | 20110124 | 14.8 | 20110511 | 17.0 | 20111009 | 22.4 |
| 20120208 | 14.5 | 20110124 | 14.6 | 20110511 | 16.9 | 20111009 | 22.3 |
| 20120209 | 14.4 | 20110124 | 14.7 | 20110512 | 16.9 | 20111009 | 22.3 |
| 20120209 | 14.4 | 20110124 | 14.7 | 20110512 | 16.8 | 20111009 | 22.3 |
| 20120209 | 14.4 | 20110124 | 14.8 | 20110512 | 16.6 | 20111009 | 22.2 |
| 20120209 | 14.4 | 20110124 | 14.7 | 20110512 | 16.7 | 20111009 | 22.2 |
| 20120209 | 14.6 | 20110125 | 14.6 | 20110512 | 16.9 | 20111009 | 21.9 |
| 20120209 | 14.6 | 20110125 | 14.5 | 20110512 | 17.0 | 20111009 | 21.3 |
| 20120209 | 14.5 | 20110125 | 14.6 | 20110512 | 16.8 | 20111010 | 21.4 |
| 20120209 | 14.3 | 20110125 | 14.7 | 20110512 | 16.8 | 20111010 | 21.3 |
| 20120210 | 14.3 | 20110125 | 14.8 | 20110513 | 16.9 | 20111010 | 21.2 |
| 20120210 | 14.3 | 20110125 | 14.8 | 20110513 | 16.9 | 20111010 | 21.2 |
| 20120210 | 14.3 | 20110125 | 14.7 | 20110513 | 17.0 | 20111010 | 21.3 |
| 20120210 | 14.3 | 20110125 | 14.7 | 20110513 | 17.4 | 20111010 | 21.2 |
| 20120210 | 14.3 | 20110126 | 14.4 | 20110513 | 18.1 | 20111010 | 20.9 |
| 20120210 | 14.3 | 20110126 | 14.3 | 20110513 | 18.6 | 20111010 | 20.7 |
| 20120210 | 14.3 | 20110126 | 14.5 | 20110513 | 18.0 | 20111011 | 20.4 |
| 20120210 | 14.3 | 20110126 | 14.6 | 20110513 | 17.6 | 20111011 | 20.3 |
| 20120211 | 14.3 | 20110126 | 14.7 | 20110514 | 17.4 | 20111011 | 20.5 |
| 20120211 | 14.4 | 20110126 | 14.8 | 20110514 | 17.3 | 20111011 | 20.8 |
| 20120211 | 14.3 | 20110126 | 14.8 | 20110514 | 17.2 | 20111011 | 20.9 |
| 20120211 | 14.3 | 20110126 | 14.7 | 20110514 | 17.7 | 20111011 | 21.0 |
| 20120211 | 14.3 | 20110127 | 14.5 | 20110514 | 18.9 | 20111011 | 20.9 |
| 20120211 | 14.4 | 20110127 | 14.4 | 20110514 | 19.1 | 20111011 | 20.8 |
| 20120211 | 14.4 | 20110127 | 14.4 | 20110514 | 18.3 | 20111012 | 20.8 |
| 20120211 | 14.3 | 20110127 | 14.5 | 20110514 | 18.3 | 20111012 | 20.8 |
| 20120212 | 14.2 | 20110127 | 14.5 | 20110515 | 18.0 | 20111012 | 20.8 |
| 20120212 | 14.3 | 20110127 | 14.6 | 20110515 | 17.9 | 20111012 | 21.0 |
| 20120212 | 14.4 | 20110127 | 14.6 | 20110515 | 18.1 | 20111012 | 21.2 |
| 20120212 | 14.3 | 20110127 | 14.5 | 20110515 | 18.4 | 20111012 | 21.2 |
| 20120212 | 14.5 | 20110128 | 14.3 | 20110515 | 19.0 | 20111012 | 21.0 |
| 20120212 | 14.4 | 20110128 | 14.3 | 20110515 | 19.1 | 20111012 | 20.8 |
| 20120212 | 14.4 | 20110128 | 14.3 | 20110515 | 18.5 | 20111013 | 20.7 |
| 20120212 | 14.4 | 20110128 | 14.4 | 20110515 | 18.2 | 20111013 | 20.7 |
| 20120213 | 14.2 | 20110128 | 14.6 | 20110516 | 17.6 | 20111013 | 20.6 |
| 20120213 | 14.0 | 20110128 | 14.8 | 20110516 | 17.5 | 20111013 | 20.7 |
| 20120213 | 14.1 | 20110128 | 14.7 | 20110516 | 16.6 | 20111013 | 21.1 |
| 20120213 | 14.3 | 20110128 | 14.6 | 20110516 | 15.7 | 20111013 | 21.3 |
| 20120213 | 14.3 | 20110129 | 14.6 | 20110516 | 15.9 | 20111013 | 20.9 |
| 20120213 | 14.4 | 20110129 | 14.6 | 20110516 | 16.0 | 20111013 | 20.8 |
| 20120213 | 14.3 | 20110129 | 14.6 | 20110516 | 15.9 | 20111014 | 20.8 |
| 20120213 | 14.3 | 20110129 | 14.7 | 20110516 | 15.8 | 20111014 | 20.7 |
| 20120214 | 14.1 | 20110129 | 14.7 | 20110517 | 16.7 | 20111014 | 20.6 |
| 20120214 | 14.1 | 20110129 | 14.6 | 20110517 | 16.9 | 20111014 | 20.7 |
| 20120214 | 14.1 | 20110129 | 14.7 | 20110517 | 16.9 | 20111014 | 21.0 |
| 20120214 | 14.1 | 20110129 | 14.7 | 20110517 | 17.0 | 20111014 | 20.9 |
| 20120214 | 14.0 | 20110130 | 14.6 | 20110517 | 17.4 | 20111014 | 20.5 |
| 20120214 | 14.0 | 20110130 | 14.5 | 20110517 | 17.7 | 20111014 | 20.2 |
| 20120214 | 13.9 | 20110130 | 14.4 | 20110517 | 17.1 | 20111015 | 20.0 |
| 20120214 | 13.9 | 20110130 | 14.5 | 20110517 | 16.9 | 20111015 | 20.1 |
| 20120215 | 13.8 | 20110130 | 14.8 | 20110518 | 16.8 | 20111015 | 20.0 |
| 20120215 | 13.8 | 20110130 | 14.8 | 20110518 | 16.7 | 20111015 | 19.6 |
| 20120215 | 13.8 | 20110130 | 14.8 | 20110518 | 16.8 | 20111015 | 19.5 |
| 20120215 | 14.0 | 20110130 | 14.7 | 20110518 | 17.2 | 20111015 | 19.5 |
| 20120215 | 14.2 | 20110131 | 14.7 | 20110518 | 17.8 | 20111015 | 19.5 |
| 20120215 | 14.1 | 20110131 | 14.6 | 20110518 | 17.8 | 20111015 | 19.4 |
| 20120215 | 14.0 | 20110131 | 14.5 | 20110518 | 17.5 | 20111016 | 19.5 |
| 20120215 | 14.0 | 20110131 | 14.5 | 20110518 | 17.3 | 20111016 | 19.5 |
| 20120216 | 14.0 | 20110131 | 14.8 | 20110519 | 17.2 | 20111016 | 19.4 |
| 20120216 | 13.9 | 20110131 | 14.9 | 20110519 | 17.0 | 20111016 | 19.4 |
| 20120216 | 14.0 | 20110131 | 14.8 | 20110519 | 17.0 | 20111016 | 19.8 |
| 20120216 | 14.0 | 20110131 | 14.7 | 20110519 | 17.5 | 20111016 | 19.9 |

|          |      |          |      |          |      |          |      |
|----------|------|----------|------|----------|------|----------|------|
| 20120216 | 14.1 | 20110201 | 14.6 | 20110519 | 18.3 | 20111016 | 19.5 |
| 20120216 | 14.0 | 20110201 | 14.6 | 20110519 | 18.5 | 20111016 | 19.3 |
| 20120216 | 13.9 | 20110201 | 14.4 | 20110519 | 18.0 | 20111017 | 18.8 |
| 20120216 | 13.9 | 20110201 | 14.4 | 20110519 | 17.8 | 20111017 | 18.9 |
| 20120217 | 13.9 | 20110201 | 14.5 | 20110520 | 17.7 | 20111017 | 18.8 |
| 20120217 | 13.8 | 20110201 | 14.4 | 20110520 | 17.4 | 20111017 | 19.0 |
| 20120217 | 13.7 | 20110201 | 14.2 | 20110520 | 17.4 | 20111017 | 19.3 |
| 20120217 | 13.7 | 20110201 | 14.1 | 20110520 | 18.1 | 20111017 | 19.4 |
| 20120217 | 14.0 | 20110202 | 14.2 | 20110520 | 18.7 | 20111017 | 19.1 |
| 20120217 | 14.0 | 20110202 | 14.3 | 20110520 | 19.0 | 20111017 | 18.9 |
| 20120217 | 13.8 | 20110202 | 14.2 | 20110520 | 18.2 | 20111018 | 18.6 |
| 20120217 | 13.8 | 20110202 | 14.1 | 20110520 | 18.2 | 20111018 | 18.7 |
| 20120218 | 13.9 | 20110202 | 14.4 | 20110521 | 18.1 | 20111018 | 18.8 |
| 20120218 | 13.9 | 20110202 | 14.6 | 20110521 | 18.0 | 20111018 | 18.8 |
| 20120218 | 13.8 | 20110202 | 14.5 | 20110521 | 17.9 | 20111018 | 19.2 |
| 20120218 | 13.9 | 20110202 | 14.2 | 20110521 | 18.3 | 20111018 | 19.2 |
| 20120218 | 14.4 | 20110203 | 14.1 | 20110521 | 18.7 | 20111018 | 19.0 |
| 20120218 | 14.6 | 20110203 | 14.2 | 20110521 | 18.6 | 20111018 | 18.8 |
| 20120218 | 14.3 | 20110203 | 14.1 | 20110521 | 18.4 | 20111019 | 18.6 |
| 20120218 | 14.1 | 20110203 | 14.2 | 20110521 | 18.3 | 20111019 | 18.6 |
| 20120219 | 14.0 | 20110203 | 14.6 | 20110522 | 18.1 | 20111019 | 18.5 |
| 20120219 | 13.9 | 20110203 | 14.6 | 20110522 | 18.1 | 20111019 | 18.8 |
| 20120219 | 13.8 | 20110203 | 14.5 | 20110522 | 18.2 | 20111019 | 19.2 |
| 20120219 | 13.8 | 20110203 | 14.4 | 20110522 | 18.2 | 20111019 | 19.4 |
| 20120219 | 14.3 | 20110204 | 14.4 | 20110522 | 18.2 | 20111019 | 19.1 |
| 20120219 | 14.5 | 20110204 | 14.4 | 20110522 | 18.3 | 20111019 | 19.0 |
| 20120219 | 14.2 | 20110204 | 14.3 | 20110522 | 18.2 | 20111020 | 18.7 |
| 20120219 | 14.0 | 20110204 | 14.3 | 20110522 | 18.1 | 20111020 | 18.5 |
| 20120220 | 14.0 | 20110204 | 14.4 | 20110523 | 18.0 | 20111020 | 18.4 |
| 20120220 | 14.0 | 20110204 | 14.5 | 20110523 | 17.9 | 20111020 | 18.7 |
| 20120220 | 13.9 | 20110204 | 14.5 | 20110523 | 17.7 | 20111020 | 19.1 |
| 20120220 | 13.9 | 20110204 | 14.3 | 20110523 | 18.1 | 20111020 | 19.1 |
| 20120220 | 14.3 | 20110205 | 14.3 | 20110523 | 18.6 | 20111020 | 18.8 |
| 20120220 | 14.4 | 20110205 | 14.3 | 20110523 | 18.6 | 20111020 | 18.6 |
| 20120220 | 14.3 | 20110205 | 14.2 | 20110523 | 18.3 | 20111021 | 18.6 |
| 20120220 | 14.2 | 20110205 | 14.3 | 20110523 | 18.1 | 20111021 | 18.6 |
| 20120221 | 14.1 | 20110205 | 14.7 | 20110524 | 18.1 | 20111021 | 19.1 |
| 20120221 | 14.1 | 20110205 | 14.8 | 20110524 | 18.1 | 20111021 | 19.4 |
| 20120221 | 14.0 | 20110205 | 14.7 | 20110524 | 18.1 | 20111021 | 19.1 |
| 20120221 | 14.0 | 20110205 | 14.5 | 20110524 | 18.2 | 20111021 | 19.0 |
| 20120221 | 14.1 | 20110206 | 14.4 | 20110524 | 18.6 | 20111021 | 18.7 |
| 20120221 | 14.1 | 20110206 | 14.4 | 20110524 | 18.7 | 20111021 | 18.6 |
| 20120221 | 14.1 | 20110206 | 14.4 | 20110524 | 18.6 | 20111022 | 18.6 |
| 20120221 | 13.9 | 20110206 | 14.4 | 20110524 | 18.3 | 20111022 | 18.5 |
| 20120222 | 13.9 | 20110206 | 14.7 | 20110525 | 18.2 | 20111022 | 18.6 |
| 20120222 | 13.8 | 20110206 | 14.8 | 20110525 | 18.2 | 20111022 | 18.9 |
| 20120222 | 13.7 | 20110206 | 14.8 | 20110525 | 18.2 | 20111022 | 19.1 |
| 20120222 | 13.6 | 20110206 | 14.6 | 20110525 | 18.4 | 20111022 | 19.1 |
| 20120222 | 13.7 | 20110207 | 14.5 | 20110525 | 19.2 | 20111022 | 19.0 |
| 20120222 | 13.7 | 20110207 | 14.4 | 20110525 | 19.1 | 20111022 | 18.9 |
| 20120222 | 13.7 | 20110207 | 14.5 | 20110525 | 18.9 | 20111023 | 18.8 |
| 20120222 | 13.8 | 20110207 | 14.6 | 20110525 | 18.6 | 20111023 | 19.1 |
| 20120223 | 13.8 | 20110207 | 14.8 | 20110526 | 18.5 | 20111023 | 19.6 |
| 20120223 | 13.8 | 20110207 | 14.9 | 20110526 | 18.5 | 20111023 | 19.9 |
| 20120223 | 13.8 | 20110207 | 14.8 | 20110526 | 18.5 | 20111023 | 20.3 |
| 20120223 | 13.9 | 20110207 | 14.7 | 20110526 | 18.7 | 20111023 | 20.5 |
| 20120223 | 14.2 | 20110208 | 14.6 | 20110526 | 19.2 | 20111023 | 20.3 |
| 20120223 | 14.2 | 20110208 | 14.6 | 20110526 | 19.6 | 20111023 | 20.1 |
| 20120223 | 14.1 | 20110208 | 14.5 | 20110526 | 19.1 | 20111024 | 19.7 |
| 20120223 | 14.0 | 20110208 | 14.5 | 20110526 | 18.9 | 20111024 | 19.4 |
| 20120224 | 13.9 | 20110208 | 15.0 | 20110527 | 18.8 | 20111024 | 19.6 |
| 20120224 | 13.9 | 20110208 | 15.0 | 20110527 | 18.8 | 20111024 | 19.7 |
| 20120224 | 13.9 | 20110208 | 14.8 | 20110527 | 19.0 | 20111024 | 20.1 |
| 20120224 | 13.8 | 20110208 | 14.7 | 20110527 | 19.3 | 20111024 | 20.1 |
| 20120224 | 14.3 | 20110209 | 14.6 | 20110527 | 20.6 | 20111024 | 19.9 |
| 20120224 | 14.6 | 20110209 | 14.6 | 20110527 | 20.4 | 20111024 | 19.7 |
| 20120224 | 14.3 | 20110209 | 14.6 | 20110527 | 19.8 | 20111025 | 19.5 |
| 20120224 | 14.2 | 20110209 | 14.6 | 20110527 | 19.3 | 20111025 | 19.5 |
| 20120225 | 14.1 | 20110209 | 14.8 | 20110528 | 19.1 | 20111025 | 19.6 |
| 20120225 | 14.1 | 20110209 | 14.8 | 20110528 | 19.8 | 20111025 | 19.9 |
| 20120225 | 14.1 | 20110209 | 14.8 | 20110528 | 19.7 | 20111025 | 20.3 |
| 20120225 | 14.1 | 20110209 | 14.7 | 20110528 | 20.0 | 20111025 | 20.3 |
| 20120225 | 14.5 | 20110210 | 14.6 | 20110528 | 20.8 | 20111025 | 20.2 |
| 20120225 | 14.6 | 20110210 | 14.6 | 20110528 | 21.8 | 20111025 | 20.1 |
| 20120225 | 14.3 | 20110210 | 14.6 | 20110528 | 21.0 | 20111026 | 20.0 |
| 20120225 | 14.2 | 20110210 | 14.6 | 20110528 | 20.3 | 20111026 | 19.9 |
| 20120226 | 14.0 | 20110210 | 14.6 | 20110529 | 20.1 | 20111026 | 19.8 |
| 20120226 | 14.0 | 20110210 | 14.7 | 20110529 | 19.3 | 20111026 | 19.9 |

|          |      |          |      |          |      |          |      |
|----------|------|----------|------|----------|------|----------|------|
| 20120226 | 13.9 | 20110210 | 14.6 | 20110529 | 19.1 | 20111026 | 20.0 |
| 20120226 | 14.0 | 20110210 | 14.5 | 20110529 | 19.5 | 20111026 | 20.0 |
| 20120226 | 14.4 | 20110211 | 14.4 | 20110529 | 20.2 | 20111026 | 20.0 |
| 20120226 | 14.6 | 20110211 | 14.4 | 20110529 | 20.3 | 20111026 | 19.9 |
| 20120226 | 14.4 | 20110211 | 14.4 | 20110529 | 20.1 | 20111027 | 19.9 |
| 20120226 | 14.2 | 20110211 | 14.5 | 20110529 | 19.8 | 20111027 | 20.0 |
| 20120227 | 14.1 | 20110211 | 14.6 | 20110530 | 19.6 | 20111027 | 20.0 |
| 20120227 | 13.9 | 20110211 | 14.6 | 20110530 | 19.6 | 20111027 | 20.2 |
| 20120227 | 14.0 | 20110211 | 14.6 | 20110530 | 20.1 | 20111027 | 20.4 |
| 20120227 | 14.0 | 20110211 | 14.5 | 20110530 | 20.2 | 20111027 | 20.4 |
| 20120227 | 14.0 | 20110212 | 14.4 | 20110530 | 21.2 | 20111027 | 20.2 |
| 20120227 | 13.9 | 20110212 | 14.4 | 20110530 | 21.2 | 20111027 | 20.1 |
| 20120227 | 13.7 | 20110212 | 14.6 | 20110530 | 20.7 | 20111028 | 20.1 |
| 20120227 | 13.7 | 20110212 | 14.5 | 20110530 | 20.4 | 20111028 | 20.0 |
| 20120228 | 13.7 | 20110212 | 14.6 | 20110531 | 20.2 | 20111028 | 19.9 |
| 20120228 | 13.7 | 20110212 | 14.5 | 20110531 | 20.2 | 20111028 | 20.1 |
| 20120228 | 13.7 | 20110212 | 14.3 | 20110531 | 20.5 | 20111028 | 20.3 |
| 20120228 | 13.8 | 20110212 | 14.3 | 20110531 | 21.0 | 20111028 | 20.4 |
| 20120228 | 14.1 | 20110213 | 14.3 | 20110531 | 21.8 | 20111028 | 20.1 |
| 20120228 | 14.2 | 20110213 | 14.2 | 20110531 | 22.9 | 20111028 | 19.9 |
| 20120228 | 13.9 | 20110213 | 14.2 | 20110531 | 22.1 | 20111029 | 19.8 |
| 20120228 | 13.7 | 20110213 | 14.2 | 20110531 | 20.8 | 20111029 | 19.8 |
| 20120229 | 13.7 | 20110213 | 14.4 | 20110601 | 20.8 | 20111029 | 19.5 |
| 20120229 | 13.7 | 20110213 | 14.6 | 20110601 | 20.6 | 20111029 | 19.8 |
| 20120229 | 13.7 | 20110213 | 14.4 | 20110601 | 20.8 | 20111029 | 20.2 |
| 20120229 | 13.7 | 20110213 | 14.2 | 20110601 | 21.3 | 20111029 | 20.2 |
| 20120229 | 14.1 | 20110214 | 14.1 | 20110601 | 21.9 | 20111029 | 20.0 |
| 20120229 | 14.3 | 20110214 | 14.0 | 20110601 | 21.9 | 20111029 | 19.9 |
| 20120229 | 14.1 | 20110214 | 14.0 | 20110601 | 21.3 | 20111030 | 19.7 |
| 20120229 | 14.1 | 20110214 | 14.2 | 20110601 | 21.0 | 20111030 | 19.7 |
| 20120301 | 14.1 | 20110214 | 14.6 |          |      | 20111030 | 19.6 |
| 20120301 | 14.0 | 20110214 | 14.8 |          |      | 20111030 | 19.7 |
| 20120301 | 14.0 | 20110214 | 14.6 |          |      | 20111030 | 19.9 |
| 20120301 | 14.1 | 20110214 | 14.4 |          |      | 20111030 | 19.9 |
| 20120301 | 14.6 | 20110215 | 14.2 |          |      | 20111030 | 19.7 |
| 20120301 | 14.7 | 20110215 | 14.2 |          |      | 20111030 | 19.6 |
| 20120301 | 14.4 | 20110215 | 14.2 |          |      | 20111031 | 19.5 |
| 20120301 | 14.2 | 20110215 | 14.4 |          |      | 20111031 | 19.7 |
| 20120302 | 14.1 | 20110215 | 14.6 |          |      | 20111031 | 19.6 |
| 20120302 | 14.0 | 20110215 | 14.8 |          |      | 20111031 | 20.0 |
| 20120302 | 14.0 | 20110215 | 14.6 |          |      | 20111031 | 20.2 |
| 20120302 | 14.1 | 20110215 | 14.4 |          |      | 20111031 | 20.2 |
| 20120302 | 14.4 | 20110216 | 14.3 |          |      | 20111031 | 20.0 |
| 20120302 | 14.4 | 20110216 | 14.3 |          |      | 20111031 | 19.8 |
| 20120302 | 14.2 | 20110216 | 14.3 |          |      | 20111101 | 19.8 |
| 20120302 | 14.2 | 20110216 | 14.4 |          |      | 20111101 | 19.8 |
| 20120303 | 14.1 | 20110216 | 14.5 |          |      | 20111101 | 19.8 |
| 20120303 | 14.0 | 20110216 | 14.5 |          |      | 20111101 | 19.8 |
| 20120303 | 14.0 | 20110216 | 14.5 |          |      | 20111101 | 20.2 |
| 20120303 | 14.1 | 20110216 | 14.5 |          |      | 20111101 | 20.2 |
| 20120305 | 14.7 | 20110217 | 14.5 |          |      | 20111101 | 20.1 |
| 20120305 | 14.8 | 20110217 | 14.5 |          |      | 20111101 | 19.8 |
| 20120305 | 14.4 | 20110217 | 14.4 |          |      | 20111102 | 19.6 |
| 20120305 | 14.3 | 20110217 | 14.5 |          |      | 20111102 | 19.7 |
| 20120306 | 14.2 | 20110217 | 14.7 |          |      | 20111102 | 19.6 |
| 20120306 | 14.2 | 20110217 | 14.7 |          |      | 20111102 | 19.8 |
| 20120306 | 14.2 | 20110217 | 14.6 |          |      | 20111102 | 20.0 |
| 20120306 | 14.2 | 20110217 | 14.6 |          |      | 20111102 | 20.1 |
| 20120306 | 14.3 | 20110218 | 14.6 |          |      | 20111102 | 19.9 |
| 20120306 | 14.4 | 20110218 | 14.6 |          |      | 20111102 | 19.8 |
| 20120306 | 14.2 | 20110218 | 14.5 |          |      | 20111103 | 19.7 |
| 20120306 | 14.1 | 20110218 | 14.5 |          |      | 20111103 | 19.7 |
| 20120307 | 14.1 | 20110218 | 14.6 |          |      | 20111103 | 19.7 |
| 20120307 | 14.1 | 20110218 | 14.6 |          |      | 20111103 | 19.8 |
| 20120307 | 14.0 | 20110218 | 14.6 |          |      | 20111103 | 20.1 |
| 20120307 | 14.0 | 20110218 | 14.6 |          |      | 20111103 | 20.1 |
| 20120307 | 14.1 | 20110219 | 14.6 |          |      | 20111103 | 19.9 |
| 20120307 | 14.2 | 20110219 | 14.6 |          |      | 20111103 | 19.8 |
| 20120307 | 14.1 | 20110219 | 14.6 |          |      | 20111104 | 19.6 |
| 20120307 | 13.9 | 20110219 | 14.6 |          |      | 20111104 | 19.5 |
| 20120308 | 13.8 | 20110219 | 14.7 |          |      | 20111104 | 19.5 |
| 20120308 | 13.9 | 20110219 | 14.7 |          |      | 20111104 | 19.5 |
| 20120308 | 13.8 | 20110219 | 14.7 |          |      | 20111104 | 19.9 |
| 20120308 | 13.8 | 20110219 | 14.6 |          |      | 20111104 | 19.9 |
| 20120308 | 14.0 | 20110220 | 14.6 |          |      | 20111104 | 19.6 |
| 20120308 | 14.3 | 20110220 | 14.7 |          |      | 20111104 | 19.5 |
| 20120308 | 14.2 | 20110220 | 14.6 |          |      | 20111105 | 19.5 |
| 20120308 | 14.2 | 20110220 | 14.7 |          |      | 20111105 | 19.5 |

|          |      |          |      |          |      |
|----------|------|----------|------|----------|------|
| 20120309 | 14.1 | 20110220 | 14.7 | 20111105 | 19.6 |
| 20120309 | 14.2 | 20110220 | 14.8 | 20111105 | 19.6 |
| 20120309 | 14.2 | 20110220 | 14.8 | 20111105 | 19.8 |
| 20120309 | 14.3 | 20110220 | 14.7 | 20111105 | 19.8 |
| 20120309 | 14.6 | 20110221 | 14.6 | 20111105 | 19.6 |
| 20120309 | 14.6 | 20110221 | 14.6 | 20111105 | 19.4 |
| 20120309 | 14.5 | 20110221 | 14.6 | 20111106 | 19.3 |
| 20120309 | 14.3 | 20110221 | 14.6 | 20111106 | 19.4 |
| 20120310 | 14.2 | 20110221 | 14.7 | 20111106 | 19.3 |
| 20120310 | 14.2 | 20110221 | 14.7 | 20111106 | 19.4 |
| 20120310 | 14.1 | 20110221 | 14.6 | 20111106 | 19.7 |
| 20120310 | 14.2 | 20110221 | 14.5 | 20111106 | 19.6 |
| 20120310 | 14.4 | 20110222 | 14.5 | 20111106 | 19.6 |
| 20120310 | 14.6 | 20110222 | 14.5 | 20111106 | 19.5 |
| 20120310 | 14.3 | 20110222 | 14.6 | 20111107 | 19.5 |
| 20120310 | 14.2 | 20110222 | 14.6 | 20111107 | 19.3 |
| 20120311 | 14.1 | 20110222 | 14.7 | 20111107 | 19.2 |
| 20120311 | 14.0 | 20110222 | 14.8 | 20111107 | 19.4 |
| 20120311 | 14.0 | 20110222 | 14.8 | 20111107 | 19.6 |
| 20120311 | 14.2 | 20110222 | 14.6 | 20111107 | 19.5 |
| 20120311 | 14.4 | 20110223 | 14.4 | 20111107 | 19.5 |
| 20120311 | 14.4 | 20110223 | 14.2 | 20111107 | 19.5 |
| 20120311 | 14.3 | 20110223 | 14.2 | 20111108 | 19.5 |
| 20120311 | 14.2 | 20110223 | 14.2 | 20111108 | 19.4 |
| 20120312 | 14.0 | 20110223 | 14.2 | 20111108 | 19.4 |
| 20120312 | 13.9 | 20110223 | 14.2 | 20111108 | 19.5 |
| 20120312 | 13.9 | 20110223 | 14.2 | 20111108 | 19.5 |
| 20120312 | 13.9 | 20110223 | 14.2 | 20111108 | 19.5 |
| 20120312 | 14.2 | 20110224 | 14.1 | 20111108 | 19.4 |
| 20120312 | 14.4 | 20110224 | 14.1 | 20111108 | 19.3 |
| 20120312 | 14.1 | 20110224 | 14.2 | 20111109 | 19.3 |
| 20120312 | 14.0 | 20110224 | 14.2 | 20111109 | 19.2 |
| 20120313 | 13.8 | 20110224 | 14.3 | 20111109 | 19.2 |
| 20120313 | 13.8 | 20110224 | 14.3 | 20111109 | 19.3 |
| 20120313 | 13.8 | 20110224 | 14.3 | 20111109 | 19.3 |
| 20120313 | 14.0 | 20110224 | 14.3 | 20111109 | 19.3 |
| 20120313 | 14.4 | 20110225 | 14.2 | 20111109 | 19.3 |
| 20120313 | 14.8 | 20110225 | 14.1 | 20111109 | 19.3 |
| 20120313 | 14.5 | 20110225 | 14.2 | 20111110 | 19.2 |
| 20120313 | 14.2 | 20110225 | 14.3 | 20111110 | 19.2 |
| 20120314 | 14.1 | 20110225 | 14.3 | 20111110 | 19.1 |
| 20120314 | 14.0 | 20110225 | 14.3 | 20111110 | 19.2 |
| 20120314 | 13.9 | 20110225 | 14.2 | 20111110 | 19.5 |
| 20120314 | 14.1 | 20110225 | 14.1 | 20111110 | 19.5 |
| 20120314 | 14.8 | 20110226 | 14.0 | 20111110 | 19.3 |
| 20120314 | 14.9 | 20110226 | 14.0 | 20111110 | 19.2 |
| 20120314 | 14.6 | 20110226 | 13.9 | 20111111 | 19.1 |
| 20120314 | 14.3 | 20110226 | 14.0 | 20111111 | 19.1 |
| 20120315 | 14.2 | 20110226 | 14.3 | 20111111 | 19.1 |
| 20120315 | 14.1 | 20110226 | 14.2 | 20111111 | 19.1 |
| 20120315 | 14.0 | 20110226 | 14.1 | 20111111 | 19.4 |
| 20120315 | 14.2 | 20110226 | 14.2 | 20111111 | 19.6 |
| 20120315 | 14.8 | 20110227 | 14.1 | 20111111 | 19.4 |
| 20120315 | 15.1 | 20110227 | 13.9 | 20111111 | 19.3 |
| 20120315 | 14.6 | 20110227 | 13.9 | 20111112 | 19.2 |
| 20120315 | 14.4 | 20110227 | 14.0 | 20111112 | 19.1 |
| 20120316 | 14.2 | 20110227 | 14.5 | 20111112 | 19.0 |
| 20120316 | 14.1 | 20110227 | 14.5 | 20111112 | 19.2 |
| 20120316 | 14.0 | 20110227 | 14.3 | 20111112 | 19.6 |
| 20120316 | 14.2 | 20110227 | 14.2 | 20111112 | 19.6 |
| 20120316 | 14.6 | 20110228 | 14.1 | 20111112 | 19.2 |
| 20120316 | 15.3 | 20110228 | 13.9 | 20111112 | 19.1 |
| 20120316 | 14.7 | 20110228 | 13.9 | 20111113 | 19.1 |
| 20120316 | 14.4 | 20110228 | 14.0 | 20111113 | 19.1 |
| 20120317 | 14.3 | 20110228 | 14.4 | 20111113 | 19.0 |
| 20120317 | 14.0 | 20110228 | 14.4 | 20111113 | 19.1 |
| 20120317 | 13.8 | 20110228 | 14.2 | 20111113 | 19.3 |
| 20120317 | 14.1 | 20110228 | 14.2 | 20111113 | 19.2 |
| 20120317 | 14.9 | 20110301 | 14.1 | 20111113 | 19.0 |
| 20120317 | 15.7 | 20110301 | 14.0 | 20111113 | 18.8 |
| 20120317 | 14.9 | 20110301 | 14.0 | 20111114 | 18.6 |
| 20120317 | 14.7 | 20110301 | 14.0 | 20111114 | 18.6 |
| 20120318 | 14.6 | 20110301 | 14.1 | 20111114 | 18.5 |
| 20120318 | 14.5 | 20110301 | 14.2 | 20111114 | 18.5 |
| 20120318 | 14.4 | 20110301 | 14.2 | 20111114 | 18.9 |
| 20120318 | 14.6 | 20110301 | 14.1 | 20111114 | 18.8 |
| 20120318 | 15.3 | 20110302 | 14.2 | 20111114 | 18.6 |
| 20120318 | 15.7 | 20110302 | 14.1 | 20111114 | 18.6 |

|          |      |
|----------|------|
| 20120318 | 15.6 |
| 20120318 | 15.0 |
| 20120319 | 14.8 |
| 20120319 | 14.7 |
| 20120319 | 14.7 |
| 20120319 | 14.8 |
| 20120319 | 15.3 |
| 20120319 | 15.9 |
| 20120319 | 15.8 |
| 20120319 | 15.4 |
| 20120320 | 15.2 |
| 20120320 | 15.0 |
| 20120320 | 14.8 |
| 20120320 | 15.0 |
| 20120320 | 15.6 |
| 20120320 | 16.3 |
| 20120320 | 15.8 |
| 20120320 | 15.4 |
| 20120321 | 15.3 |
| 20120321 | 15.0 |
| 20120321 | 14.9 |
| 20120321 | 15.1 |
| 20120321 | 15.5 |
| 20120321 | 15.9 |
| 20120321 | 15.4 |
| 20120321 | 15.1 |
| 20120322 | 15.0 |
| 20120322 | 14.9 |
| 20120322 | 14.8 |
| 20120322 | 15.0 |
| 20120322 | 15.5 |
| 20120322 | 15.9 |
| 20120322 | 15.2 |
| 20120322 | 14.9 |
| 20120323 | 14.7 |
| 20120323 | 14.7 |
| 20120323 | 14.6 |
| 20120323 | 14.8 |
| 20120323 | 15.9 |
| 20120323 | 16.3 |
| 20120323 | 15.6 |
| 20120323 | 15.1 |
| 20120324 | 14.8 |
| 20120324 | 14.8 |
| 20120324 | 15.0 |
| 20120324 | 15.3 |
| 20120324 | 16.4 |
| 20120324 | 17.0 |
| 20120324 | 15.9 |
| 20120324 | 16.0 |
| 20120325 | 15.8 |
| 20120325 | 15.3 |
| 20120325 | 15.1 |
| 20120325 | 15.5 |
| 20120325 | 15.9 |
| 20120325 | 15.6 |
| 20120325 | 14.8 |
| 20120325 | 14.6 |
| 20120326 | 14.7 |
| 20120326 | 14.7 |
| 20120326 | 14.8 |
| 20120326 | 15.3 |
| 20120326 | 16.4 |
| 20120326 | 16.3 |
| 20120326 | 15.7 |
| 20120326 | 15.4 |
| 20120327 | 15.1 |
| 20120327 | 14.9 |
| 20120327 | 14.9 |
| 20120327 | 15.2 |
| 20120327 | 16.1 |
| 20120327 | 16.7 |
| 20120327 | 15.8 |
| 20120327 | 15.3 |
| 20120328 | 15.1 |
| 20120328 | 15.1 |
| 20120328 | 15.1 |
| 20120328 | 15.5 |

|          |      |
|----------|------|
| 20110302 | 14.1 |
| 20110302 | 14.2 |
| 20110302 | 14.5 |
| 20110302 | 14.6 |
| 20110302 | 14.5 |
| 20110302 | 14.3 |

|          |      |
|----------|------|
| 20111115 | 18.5 |
| 20111115 | 18.5 |
| 20111115 | 18.6 |
| 20111115 | 18.8 |
| 20111115 | 19.1 |
| 20111115 | 19.0 |
| 20111115 | 18.7 |
| 20111115 | 18.7 |
| 20111116 | 18.6 |
| 20111116 | 18.5 |
| 20111116 | 18.5 |
| 20111116 | 18.5 |
| 20111116 | 18.7 |
| 20111116 | 18.5 |
| 20111116 | 18.3 |
| 20111116 | 18.2 |
| 20111117 | 18.3 |
| 20111117 | 18.3 |
| 20111117 | 18.2 |
| 20111117 | 18.3 |
| 20111117 | 18.5 |
| 20111117 | 18.5 |
| 20111117 | 18.3 |
| 20111117 | 18.1 |
| 20111118 | 18.1 |
| 20111118 | 18.1 |
| 20111118 | 18.1 |
| 20111118 | 18.2 |
| 20111118 | 18.5 |
| 20111118 | 18.4 |
| 20111118 | 18.2 |
| 20111118 | 18.2 |
| 20111119 | 18.3 |
| 20111119 | 18.3 |
| 20111119 | 18.3 |
| 20111119 | 18.4 |
| 20111119 | 18.6 |
| 20111119 | 18.5 |
| 20111119 | 18.3 |
| 20111119 | 18.1 |
| 20111120 | 18.1 |
| 20111120 | 18.0 |
| 20111120 | 18.2 |
| 20111120 | 18.4 |
| 20111120 | 18.5 |
| 20111120 | 18.6 |
| 20111120 | 18.4 |
| 20111120 | 18.4 |
| 20111121 | 18.2 |
| 20111121 | 18.1 |
| 20111121 | 18.1 |
| 20111121 | 18.3 |
| 20111121 | 18.4 |
| 20111121 | 18.4 |
| 20111121 | 18.2 |
| 20111121 | 18.1 |
| 20111122 | 18.1 |
| 20111122 | 18.1 |
| 20111122 | 18.0 |
| 20111122 | 18.0 |
| 20111122 | 17.9 |
| 20111122 | 17.8 |
| 20111122 | 17.8 |
| 20111123 | 18.0 |
| 20111123 | 17.9 |
| 20111123 | 17.9 |
| 20111123 | 18.1 |
| 20111123 | 18.3 |
| 20111123 | 18.2 |
| 20111123 | 18.1 |
| 20111123 | 18.1 |
| 20111124 | 18.1 |
| 20111124 | 18.1 |
| 20111124 | 18.1 |
| 20111124 | 18.2 |
| 20111124 | 18.6 |
| 20111124 | 18.7 |

|          |      |
|----------|------|
| 20120328 | 16.2 |
| 20120328 | 16.5 |
| 20120328 | 15.7 |
| 20120328 | 14.9 |
| 20120329 | 14.9 |
| 20120329 | 15.1 |
| 20120329 | 15.3 |
| 20120329 | 15.6 |
| 20120329 | 16.6 |
| 20120329 | 16.8 |
| 20120329 | 16.1 |
| 20120329 | 15.4 |
| 20120330 | 15.3 |
| 20120330 | 15.3 |
| 20120330 | 15.5 |
| 20120330 | 15.8 |
| 20120330 | 16.5 |
| 20120331 | 16.7 |
| 20120331 | 16.4 |
| 20120331 | 15.9 |
| 20120331 | 15.7 |
| 20120401 | 15.5 |
| 20120401 | 15.4 |
| 20120401 | 15.3 |
| 20120401 | 15.6 |
| 20120401 | 16.1 |
| 20120401 | 17.0 |
| 20120401 | 16.7 |
| 20120401 | 16.2 |
| 20120402 | 16.0 |
| 20120402 | 15.9 |
| 20120402 | 15.9 |
| 20120402 | 16.1 |
| 20120402 | 16.6 |
| 20120402 | 16.9 |
| 20120402 | 16.5 |
| 20120402 | 16.2 |
| 20120403 | 16.1 |
| 20120403 | 15.9 |
| 20120403 | 15.7 |
| 20120403 | 15.9 |
| 20120403 | 16.5 |
| 20120403 | 16.7 |
| 20120403 | 16.5 |
| 20120403 | 16.3 |
| 20120404 | 16.3 |
| 20120404 | 16.2 |
| 20120404 | 16.1 |
| 20120404 | 15.8 |
| 20120404 | 16.2 |
| 20120404 | 16.7 |
| 20120404 | 16.4 |
| 20120404 | 16.1 |
| 20120405 | 16.0 |
| 20120405 | 15.7 |
| 20120405 | 15.7 |
| 20120405 | 15.9 |
| 20120405 | 16.4 |
| 20120405 | 16.8 |
| 20120405 | 16.4 |
| 20120405 | 16.1 |
| 20120406 | 15.8 |
| 20120406 | 15.9 |
| 20120406 | 15.9 |
| 20120406 | 16.0 |
| 20120406 | 16.5 |
| 20120406 | 16.9 |
| 20120406 | 16.4 |
| 20120406 | 15.9 |
| 20120407 | 15.9 |
| 20120407 | 15.8 |
| 20120407 | 15.8 |
| 20120407 | 15.9 |
| 20120407 | 15.9 |
| 20120407 | 15.9 |
| 20120407 | 15.7 |
| 20120407 | 15.3 |
| 20120408 | 15.1 |

|          |      |
|----------|------|
| 20111124 | 18.7 |
| 20111124 | 18.5 |



|          |      |
|----------|------|
| 20120408 | 15.2 |
| 20120408 | 15.3 |
| 20120408 | 15.5 |
| 20120408 | 15.6 |
| 20120408 | 14.9 |
| 20120408 | 14.8 |
| 20120408 | 15.3 |
| 20120409 | 15.3 |
| 20120409 | 15.1 |
| 20120409 | 14.7 |
| 20120409 | 14.7 |
| 20120409 | 15.0 |
| 20120409 | 15.0 |
| 20120409 | 15.0 |
| 20120409 | 15.0 |
| 20120410 | 15.0 |
| 20120410 | 15.0 |
| 20120410 | 15.0 |
| 20120410 | 15.2 |
| 20120410 | 15.8 |
| 20120410 | 15.9 |
| 20120410 | 15.9 |
| 20120410 | 15.5 |
| 20120411 | 15.3 |
| 20120411 | 15.1 |
| 20120411 | 15.1 |
| 20120411 | 15.4 |
| 20120411 | 15.8 |
| 20120411 | 16.0 |
| 20120411 | 15.9 |
| 20120411 | 15.7 |
| 20120412 | 15.5 |
| 20120412 | 15.5 |
| 20120412 | 15.5 |
| 20120412 | 15.8 |
| 20120412 | 15.9 |
| 20120412 | 15.9 |
| 20120412 | 15.7 |
| 20120412 | 15.8 |
| 20120413 | 15.7 |
| 20120413 | 15.6 |
| 20120413 | 15.5 |
| 20120413 | 15.4 |
| 20120413 | 15.7 |
| 20120413 | 15.9 |
| 20120413 | 15.8 |
| 20120413 | 15.8 |
| 20120414 | 15.8 |
| 20120414 | 15.5 |
| 20120414 | 15.4 |
| 20120414 | 15.5 |
| 20120414 | 15.5 |
| 20120414 | 14.8 |
| 20120414 | 14.6 |
| 20120414 | 15.2 |
| 20120415 | 15.2 |
| 20120415 | 15.2 |
| 20120415 | 15.3 |
| 20120415 | 15.4 |
| 20120415 | 15.7 |
| 20120415 | 15.9 |
| 20120415 | 15.7 |
| 20120415 | 15.5 |
| 20120416 | 15.5 |
| 20120416 | 15.3 |
| 20120416 | 15.3 |
| 20120416 | 15.4 |
| 20120416 | 15.5 |
| 20120416 | 15.6 |
| 20120416 | 15.4 |
| 20120416 | 15.3 |
| 20120417 | 15.3 |
| 20120417 | 15.2 |
| 20120417 | 15.1 |
| 20120417 | 15.4 |
| 20120417 | 15.9 |
| 20120417 | 15.9 |
| 20120417 | 15.6 |

|          |      |
|----------|------|
| 20120417 | 15.3 |
| 20120418 | 15.3 |
| 20120418 | 15.2 |
| 20120418 | 15.2 |
| 20120418 | 15.3 |
| 20120418 | 15.6 |
| 20120418 | 15.5 |
| 20120418 | 15.2 |
| 20120418 | 15.3 |
| 20120419 | 15.3 |
| 20120419 | 15.3 |
| 20120419 | 15.3 |
| 20120419 | 15.4 |
| 20120419 | 15.6 |
| 20120419 | 15.5 |
| 20120419 | 15.4 |
| 20120419 | 15.4 |
| 20120420 | 15.3 |
| 20120420 | 15.4 |
| 20120420 | 15.3 |
| 20120420 | 15.4 |
| 20120420 | 15.6 |
| 20120420 | 15.5 |
| 20120420 | 15.4 |
| 20120420 | 15.4 |
| 20120421 | 15.4 |
| 20120421 | 15.4 |
| 20120421 | 15.3 |
| 20120421 | 15.4 |
| 20120421 | 15.7 |
| 20120421 | 15.9 |
| 20120421 | 15.6 |
| 20120421 | 15.5 |
| 20120422 | 15.4 |
| 20120422 | 15.4 |
| 20120422 | 15.3 |
| 20120422 | 15.7 |
| 20120422 | 16.2 |
| 20120422 | 16.5 |
| 20120422 | 16.1 |
| 20120422 | 15.9 |
| 20120423 | 15.7 |
| 20120423 | 15.7 |
| 20120423 | 15.7 |
| 20120423 | 15.9 |
| 20120423 | 16.0 |
| 20120423 | 15.9 |
| 20120423 | 15.7 |
| 20120423 | 15.5 |
| 20120424 | 15.3 |
| 20120424 | 15.1 |
| 20120424 | 15.1 |
| 20120424 | 15.6 |
| 20120424 | 16.5 |
| 20120424 | 16.8 |
| 20120424 | 16.1 |
| 20120424 | 15.7 |
| 20120425 | 15.6 |
| 20120425 | 15.6 |
| 20120425 | 15.6 |
| 20120425 | 15.9 |
| 20120425 | 15.9 |
| 20120425 | 15.9 |
| 20120425 | 15.9 |
| 20120425 | 15.9 |
| 20120425 | 15.9 |
| 20120426 | 15.8 |
| 20120426 | 15.8 |
| 20120426 | 15.8 |
| 20120426 | 16.1 |
| 20120426 | 16.9 |
| 20120426 | 17.1 |
| 20120426 | 17.0 |
| 20120426 | 16.9 |
| 20120427 | 16.8 |
| 20120427 | 16.6 |
| 20120427 | 16.4 |
| 20120427 | 16.9 |
| 20120427 | 17.9 |

|            |             |            |             |            |             |            |             |            |             |            |             |
|------------|-------------|------------|-------------|------------|-------------|------------|-------------|------------|-------------|------------|-------------|
| 20120427   | 18.1        |            |             |            |             |            |             |            |             |            |             |
| 20120427   | 17.2        |            |             |            |             |            |             |            |             |            |             |
| 20120427   | 16.2        |            |             |            |             |            |             |            |             |            |             |
| 20120428   | 16.2        |            |             |            |             |            |             |            |             |            |             |
| 20120428   | 16.3        |            |             |            |             |            |             |            |             |            |             |
| 20120428   | 16.4        |            |             |            |             |            |             |            |             |            |             |
| 20120428   | 16.9        |            |             |            |             |            |             |            |             |            |             |
| 20120428   | 17.5        |            |             |            |             |            |             |            |             |            |             |
| 20120428   | 18.0        |            |             |            |             |            |             |            |             |            |             |
| 20120428   | 18.3        |            |             |            |             |            |             |            |             |            |             |
| 20120428   | 17.8        |            |             |            |             |            |             |            |             |            |             |
| <b>AVG</b> | <b>15.6</b> | <b>AVG</b> | <b>15.7</b> | <b>AVG</b> | <b>16.2</b> | <b>AVG</b> | <b>22.8</b> | <b>AVG</b> | <b>23.5</b> | <b>AVG</b> | <b>25.6</b> |
| <b>SD</b>  | <b>1.2</b>  | <b>SD</b>  | <b>1.3</b>  | <b>SD</b>  | <b>1.7</b>  | <b>SD</b>  | <b>3.0</b>  | <b>SD</b>  | <b>1.7</b>  | <b>SD</b>  | <b>1.1</b>  |
| <b>n</b>   | <b>1177</b> | <b>n</b>   | <b>860</b>  | <b>n</b>   | <b>728</b>  | <b>n</b>   | <b>934</b>  | <b>n</b>   | <b>408</b>  | <b>n</b>   | <b>520</b>  |
| <b>95%</b> | <b>0.1</b>  | <b>95%</b> | <b>0.1</b>  | <b>95%</b> | <b>0.1</b>  | <b>95%</b> | <b>0.2</b>  | <b>95%</b> | <b>0.2</b>  | <b>95%</b> | <b>0.1</b>  |
| <b>CI</b>  | <b>15.5</b> | <b>CI</b>  | <b>15.6</b> | <b>CI</b>  | <b>16.0</b> | <b>CI</b>  | <b>22.6</b> | <b>CI</b>  | <b>23.4</b> | <b>CI</b>  | <b>25.5</b> |
| <b>CI</b>  | <b>15.6</b> | <b>CI</b>  | <b>15.7</b> | <b>CI</b>  | <b>16.3</b> | <b>CI</b>  | <b>23.0</b> | <b>CI</b>  | <b>23.7</b> | <b>CI</b>  | <b>25.7</b> |

92  
93  
94  
95  
96  
97  
98  
99  
00  
01

**Table S3. At-depth temperature data for the six experimental transplant periods.** At-depth temperatures were obtained from linear regression analysis between depth temperature, recorded by temperature sensors placed in the sea bottom for almost 23 months (from June 3<sup>rd</sup> 2011 to April 25<sup>th</sup> 2013), and sea surface temperature, recorded by mareographic stations close to Panarea Island using SM3810 (Society for Environmental and Industrial monitoring; SIAP+MICROS) from the National Mareographic Network of the Institute for the Environmental Protection and Research (ISPRA, available to <http://www.mareografico.it>)
